# Supplementary material for: Risk factors for persistence of livestock-associated MRSA and environmental exposure in veal calf farmers and their family members: an observational longitudinal study
Source: PubMed Central journal article supplement — BMJ Open. 2013 Sep 19;3(9):e003272. doi: 10.1136/bmjopen-2013-003272 (PMC3780428; doi:10.1136/bmjopen-2013-003272), 2013-09-19
Supplement: bmjopen-2013-003272.draft_revisions.pdf [file bmjopen-2013-003272.draft_revisions.pdf]

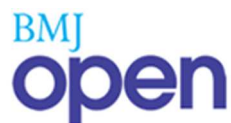

**Risk factors for livestock-associated MRSA persistent carriage and environmental exposure in veal calf farmers and their family members: an observational longitudinal study.**

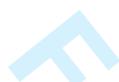

|                                 |                                                                                                                                                                                                                                                                                                                                                                                                                                                                                                                                                                                                                                                                                                                                                                                                                                                                                                                                                                                                                                                                                                                                                                                                                                                           |
|---------------------------------|-----------------------------------------------------------------------------------------------------------------------------------------------------------------------------------------------------------------------------------------------------------------------------------------------------------------------------------------------------------------------------------------------------------------------------------------------------------------------------------------------------------------------------------------------------------------------------------------------------------------------------------------------------------------------------------------------------------------------------------------------------------------------------------------------------------------------------------------------------------------------------------------------------------------------------------------------------------------------------------------------------------------------------------------------------------------------------------------------------------------------------------------------------------------------------------------------------------------------------------------------------------|
| Journal:                        | <i>BMJ Open</i>                                                                                                                                                                                                                                                                                                                                                                                                                                                                                                                                                                                                                                                                                                                                                                                                                                                                                                                                                                                                                                                                                                                                                                                                                                           |
| Manuscript ID:                  | bmjopen-2013-003272                                                                                                                                                                                                                                                                                                                                                                                                                                                                                                                                                                                                                                                                                                                                                                                                                                                                                                                                                                                                                                                                                                                                                                                                                                       |
| Article Type:                   | Research                                                                                                                                                                                                                                                                                                                                                                                                                                                                                                                                                                                                                                                                                                                                                                                                                                                                                                                                                                                                                                                                                                                                                                                                                                                  |
| Date Submitted by the Author:   | 21-May-2013                                                                                                                                                                                                                                                                                                                                                                                                                                                                                                                                                                                                                                                                                                                                                                                                                                                                                                                                                                                                                                                                                                                                                                                                                                               |
| Complete List of Authors:       | Dorado-Garcia, Alejandro; Division of Environmental Epidemiology, Institute for Risk Assessment Sciences, Utrecht University, Bos, Marian; Division of Environmental Epidemiology, Institute for Risk Assessment Sciences, Utrecht University, Graveland, Haitske; National Centre for Infectious Disease Control Netherlands, RIVM National Institute for Public Health and The Environment, van Cleef, Brigitte; National Centre for Infectious Disease Control Netherlands, RIVM National Institute for Public Health and The Environment, ; Laboratory for Medical Microbiology and Immunology, St. Elisabeth Hospital, Verstappen, Koen; Department of Infectious Diseases and Immunology, Faculty of Veterinary Medicine, Utrecht University, kluymans, jan; Laboratory for Medical Microbiology and Immunology, St. Elisabeth Hospital, Wagenaar, Jaap; Animal Sciences Group, Central Veterinary Institute of Wageningen UR, ; Department of Infectious Diseases and Immunology, Faculty of Veterinary Medicine, Utrecht University, Heederik, Dick; Division of Environmental Epidemiology, Institute for Risk Assessment Sciences, Utrecht University, ; Julius Center for Health Sciences and Primary Care, University Medical Center Utrecht, |
| <b>Primary Subject Heading</b>: | Public health                                                                                                                                                                                                                                                                                                                                                                                                                                                                                                                                                                                                                                                                                                                                                                                                                                                                                                                                                                                                                                                                                                                                                                                                                                             |
| Secondary Subject Heading:      | Epidemiology                                                                                                                                                                                                                                                                                                                                                                                                                                                                                                                                                                                                                                                                                                                                                                                                                                                                                                                                                                                                                                                                                                                                                                                                                                              |
| Keywords:                       | EPIDEMIOLOGY, Microbiology < BASIC SCIENCES, Public health < INFECTIOUS DISEASES, Epidemiology < INFECTIOUS DISEASES                                                                                                                                                                                                                                                                                                                                                                                                                                                                                                                                                                                                                                                                                                                                                                                                                                                                                                                                                                                                                                                                                                                                      |
|                                 |                                                                                                                                                                                                                                                                                                                                                                                                                                                                                                                                                                                                                                                                                                                                                                                                                                                                                                                                                                                                                                                                                                                                                                                                                                                           |

SCHOLARONE™  
Manuscripts

**Title:**

Risk factors for livestock-associated MRSA persistent carriage and environmental exposure in veal calf farmers and their family members: an observational longitudinal study.

**Short Title:** LA-MRSA persistent carriage and environmental exposure in pig farming.

**Authors:**

Alejandro Dorado-García<sup>1</sup>, Marian EH Bos<sup>1</sup>, Haitske Graveland<sup>2</sup>, Brigitte AGL van Cleef<sup>2,3</sup>, Koen M Verstappen<sup>4</sup>, Jan AJW Kluytmans<sup>3</sup>, Jaap A Wagenaar<sup>4,5</sup>, Dick JJ Heederik<sup>1,6</sup>.

**Affiliations:**

1. Institute for Risk Assessment Sciences, Division of Environmental Epidemiology, Utrecht University, Utrecht, The Netherlands.
2. Centre for Infectious Disease Control Netherlands, RIVM National Institute for Public Health and The Environment, Bilthoven, The Netherlands.
3. Laboratory for Medical Microbiology and Immunology, St. Elisabeth Hospital, Tilburg, The Netherlands.
4. Department of Infectious Diseases and Immunology, Faculty of Veterinary Medicine, Utrecht University, Utrecht, The Netherlands.
5. Animal Sciences Group, Central Veterinary Institute of Wageningen UR, Lelystad, The Netherlands.
6. Julius Center for Health Sciences and Primary Care, University Medical Center Utrecht, Utrecht, The Netherlands.

**Correspondence to:**

Dorado-García A., Institute for Risk Assessment Sciences, Utrecht University, PO Box 80178, 3508 TD Utrecht, The Netherlands. T: +31-30-253 8950. F: +31-30-253 9499. Email: a.doradogarcia@uu.nl.

**Key words (max 5):** Livestock-Associated MRSA, persistent carriage, longitudinal study, veal calves, environmental contamination

**Word count excluding title page, abstract, references, figures and tables:** 4.168

## ABSTRACT

**Objectives:** LA-MRSA emergence is a major public health concern. This study is aimed at assessing risk factors for persistently carrying MRSA in veal calf farmers and their family members. We also evaluate the dynamics of MRSA environmental load during the veal-calf production cycle.

**Design:** Observational, longitudinal, repeated cross-sectional study.

**Setting:** 52 veal calf farms in the Netherlands.

**Participants:** Between the end of 2010 to the end of 2011, a total of 211 farmers, family members and employees were included in the study.

**Primary outcome and secondary outcome measures:** Nasal swabs were taken from participants on days 0, 4, 7 and week 12. A persistent MRSA carrier was defined as a person positive for MRSA on days 0, 4 and 7. Participants filled in an extensive questionnaire to identify potential risk factors and confounders. For estimation of MRSA prevalence in calves and environmental contamination, animal nasal swabs and Electrostatic Dust Collectors (EDCs) were taken on day 0 and week 12.

**Results:** The presence of potential animal reservoirs (free-ranging farm cats and sheep) and the level of contact with veal calves was positively associated with persistent MRSA carriage. Interestingly, at the end of the study (week 12), there was a two-fold rise in animal prevalence and a significantly higher MRSA environmental load in the stables was found on farms with MRSA carriers.

**Conclusions:** This study supports the hypothesis that environmental contamination with MRSA plays a role in the acquisition of MRSA in farmers and their household members and suggests that other animal species should also be targeted to implement effective control strategies.

## ARTICLE SUMMARY

### Article focus:

- Determinants for persistent LA-MRSA carriage in humans and for a possible true colonization have not been thoroughly assessed.
- It is unclear whether bacterial contamination in the farm environment plays a role in LA-MRSA transmission in humans

### Key messages:

- The presence of other animals in the farm might be of importance in acquisition and persistence LA-MRSA in humans. There is a need for detailed molecular-epidemiological analysis of MRSA specimens in various animal species and humans in the veal-calf farming community.

- During the veal-calf production cycle, there is a parallel increase in animal prevalence and environmental MRSA load which is linked to higher risk for human carriage.

### Strengths and limitations of this study:

The longitudinal nature of the data allows to establish dynamic epidemiological inferences.

No other animals apart from veal-calves were sampled in this study. The self-sampling of noses by individuals might influence the sensitivity for MRSA detection.

## INTRODUCTION

In recent years, livestock-associated methicillin-resistant *Staphylococcus aureus* (LA-MRSA), specifically sequence type (ST) 398, has emerged in food-producing animals and people in contact with these animals.(1-4) Illness associated to ST398 in humans is rare and only a small proportion of MRSA infections can be attributed to LA-MRSA.(5,6) Nonetheless, invasive infections and hospital outbreaks of MRSA ST398 have been reported in Europe, the United States and Asia.(5,7,8)

LA-MRSA strains have been found mainly in pigs and veal calves, but they have the capacity to colonize a wide spectrum of hosts, including sheep and poultry.(9) Farmers are easily contaminated and in general the carriage prevalence in farmers is high. Frequency of transmission between farmers and their family members and among hospitalized humans appears to be low.(2,10,11) However, this belief might be contradicted by recently described LA-MRSA transmission events in Dutch patients with neither risk factors nor livestock contact.(12) The potential public health threat posed by these strains is emphasized in a recent metapopulation model in which the likelihood of persistent carriage in the livestock-exposed population was the key parameter for LA-MRSA spreading to the community.(13)

Previous studies have been mainly based on cross-sectional designs and have shown that intensity of animal contact and MRSA prevalence among animals are positively associated to LA-MRSA human carriage.(14) Associations between animal carriage and farm hygiene and antimicrobial use have also been shown.(15,16) A longitudinal study including periods of high and low exposure to animals showed that LA-MRSA carriage was mainly transient. It was suggested that LA-MRSA is a poor persistent colonizer in humans, which was confirmed by a study on short term occupational exposure.(10,14) However, risk factors for persistent LA-MRSA carriage and for a possible true colonization have not been thoroughly assessed. Furthermore, little is still known about the dynamics of environmental contamination with MRSA in the farm and its role in transmission to humans. A recent study showed a steep increase in prevalence among calves and in MRSA air load during the production cycle.(17)

The aim of the current study is twofold. Firstly, to assess risk factors and dose-response relationships for persistently carrying MRSA over a period of one week at the beginning of the production cycle in veal calf farmers and their family members. Secondly, to evaluate the deposition of MRSA-containing dust inside the farm and its relationship with animal and human MRSA carriage.

## MATERIALS AND METHODS

### Study design and population

A longitudinal cohort study was performed over a period of 12 weeks in 52 veal calf farms starting at the beginning of the production cycle. All farms were visited from the end of 2010 to the end of 2011. On each farm there were 2 sampling moments for animal and environmental samples (day 0 and week 12) and 4 sampling moments for human samples (days 0, 4, 7 and week 12). Nasal swabs from both anterior nares of calves were taken and analysed in 10 pools of 6 swabs each (60 animals per farm). Swabs were also collected from farmers, family members and employees (n=211). On day 0, quantitative nasal and throat swabs were taken by field workers in the majority of participants or by self-sampling. On days 4, 7 and on week 12, dry cotton swabs (Copan, Brescia, Italy) were used to self-sample the nose. Swabs were given to participants with instructions including photographs in case of self-sampling. Nasal swabs in animals and humans were introduced in the nostril and rotated once. Throat swabs in humans sampled the area of the inner cheek including the tonsils. The swabs were immediately taken to the laboratory or sent by post and processed within 24 hours after arrival. Furthermore, environmental samples were taken by placing 4 Electrostatic Dust Collectors (EDCs) (Zeeman, Utrecht, The Netherlands) on different surfaces inside the stables and one on the highest cupboard in the living room or kitchen of the house. The EDCs were left in place during a period of 2 weeks and sent by post to the laboratory. Upon arrival, EDC samples were stored at -20°C until quantitative analysis.<sup>(18)</sup> A schematic overview of the study design is displayed in the Supplemental Figure 1.

All participants completed an informed consent and filled in an extensive questionnaire including items related to individual health status, household and farm characteristics, activities performed on the farm and hygiene practices. The protocol of the study was approved by Medical Ethical Committee of Utrecht University. The collection of animal samples was in compliance with the Dutch Law on Animal Health and Welfare.

For the assessment of MRSA persistent carriage, we selected the beginning of the veal calf production cycle, just after the stables were empty and when animal prevalence is lower. In this period, deposition of MRSA-containing dust particles in human nasal cavities and mechanical carriage was assumed to be less likely. Therefore and for the purpose of this study, a person was defined to be a persistent MRSA carrier when each of the nasal swabs collected on days 0, 4 and 7 were positive for MRSA presence.

### Laboratory analysis

Swabs in liquid transport medium (ESwab, Copan, Brescia, Italy) were used for quantitative cultivation. Serial dilutions (1:10) of the transport medium (concentration  $10^0$ ) were made by adding 100 µl sample to 900 µl phosphate buffered saline (PBS) to a final concentration of  $10^{-4}$  of the original sample. Each dilution was cultured on chromID *S. aureus* and chromID MRSA agar plates (BioMérieux, La Balme Les Grottes, France) at 37°C for 18-24 hours. Plates with 10-100 colony-forming units (CFU) were used to calculate the original amount of CFU per swab. In order to detect positive samples without bacterial growth in the first day, the remaining transport medium and swab were enriched overnight in Mueller Hinton broth with 6.5% NaCl (MH+), and consequently cultured on chromID *S. aureus* and chromID MRSA agar plates. The theoretical lower limit of quantification (LLOQ) of MRSA CFU was 10. Dry cotton swabs (Copan) were inoculated directly onto chromID *S. aureus*,

1  
2  
3  
4 chromID MRSA and MH+. Confirmation of MRSA presence in the 3 sampling moments was  
5 done by Real-Time PCR targeting *mecA*, *femA* and *nuc* genes.(19,20) Methicillin-susceptible  
6 *Staphylococcus aureus* (MSSA) presence was tested when the bacterial growth on chromID  
7 *S. aureus* was higher than on chromID MRSA. For this purpose, 10 colonies were screened  
8 for methicillin susceptibility by using the cefoxitin disk diffusion method. Confirmation of  
9 MSSA was done by Real-Time PCR. Nasal swabs from calves were analysed in pools  
10 following standard procedures previously described.(21)  
11

12 To obtain an estimate of exposure in CFU per EDC, EDCs were analysed by Real-Time  
13 quantitative PCR (qPCR). EDC samples were suspended in 10 mL EDTA saline buffer (150  
14 mM NaCl, 1 mM EDTA) and mixed in a Stomacher (Seward Ltd., London, United Kindom)  
15 for 10 minutes. Two mL of the resulting suspension was stored at -20°C for the analysis. For  
16 DNA isolation, 200 µL of the suspension was incubated at 95°C for 15 minutes. Phosphate  
17 buffered saline (PBS) was added and a Versant kPCR molecular system (Siemens Healthcare  
18 Diagnostics, The Hague, The Netherlands) was used for DNA purification with an elution  
19 volume of 50 µL. Five µL of the purified sample were used for detection of *mecA*, *femA* and  
20 *nuc* genes by the means of a LightCycler 480-II system (Roche Diagnostics, Almere, The  
21 Netherlands). For MRSA quantification, a standard curve was established for all targets. A  
22 standard control sample was included in each run to correct the curve for run-to-run variation.  
23 For interpretation of the results, CFU counts per PCR were transformed to CFU counts per  
24 EDC (1 CFU/PCR = 200 CFU/EDC). The theoretical limit of detection (LOD) was 20  
25 CFU/EDC.  
26  
27

## 28 29 **Data analysis**

30  
31 Statistical analysis was performed using SAS software version 9.2 (SAS institute Inc.,  
32 Cary, North Carolina, USA). Descriptive analysis determined the cross-sectional human  
33 prevalences on each of the 4 sampling moments and the longitudinal carriage patterns  
34 (persistent, intermittent or non-carriers).  
35

36 Risk factors for nasal MRSA persistent carriage were investigated with univariate and  
37 multivariate analysis. PROC GENMOD was used for Generalized Estimating Equations  
38 (GEE) modelling to take clustering of data at farm level into account. The mean response was  
39 modelled with a Poisson regression with robust standard errors. Crude and age-sex adjusted  
40 prevalence ratios were obtained. Eligibility criteria for variables to be considered in  
41 multivariable analysis included univariate p-values below 0.2, less than 10% of missing data  
42 in relation with the outcome, and at least 2 persistent carriers falling in each of the categories  
43 of the explanatory categorical variables. Bivariate correlation structure of all eligible  
44 variables was studied with PROC CORR and Spearman correlation coefficients were  
45 obtained. Thereafter, eligible variables were added in a stepwise backward selection approach  
46 and retained in the final model when  $P < 0.15$ . A  $p\text{-value} < 0.05$  was considered statistically  
47 significant.  
48  
49

50  
51 The shape of the relationships between MRSA persistent carriage and numerical  
52 variables was studied by means of nonparametric or semiparametric regression modelling  
53 (smoothing) using PROC GAM to relax the assumption of linearity. For this purpose, the  
54 number of CFU from quantitative nasal swabs positive for MRSA but below LLOQ was set  
55 to 5.  
56  
57  
58  
59  
60

To assess the environmental exposure during the first week, farms were classified in 3 categories: i) farm with persistent carrier, when there was at least one MRSA persistent carrier working and/or living on the farm; ii) farm with intermittent carrier, when there was at least one MRSA intermittent carrier and there was no persistent carrier on the farm; iii) non-carrier farm, when all people at the farm were MRSA-negative on the first 3 sampling moments. On week 12 farms were classified as carrier and non-carrier farms when there was at least one MRSA carrier on the farm, and when all people on the farm were MRSA-negative on week 12 respectively. Proportions of MRSA-positive EDCs were calculated per farm category and sampling moment. For calculation of average exposure levels, CFU counts per EDC were log-transformed since they followed a highly right-tailed distribution. PROC LIFEREG was used for left-censored regression (tobit) modelling to obtain an accurate estimate of the mean exposure level accounting for the large proportion of undetectable values. Thereafter geometric means (GM) were calculated.

## RESULTS

### Descriptive results

Nasal swabs were collected from 211 participants on 52 farms. The total population average nasal MRSA prevalence for the 4 sampling moments was 17.6% and in farmers it was twice as high (29.7%) as in family members (13.0%). Cross-sectional nasal MRSA prevalences per sampling moment are displayed in Supplemental Figure 2.

Nasal carriage patterns for MRSA, MSSA and *S. aureus* in general (including both MSSA and MRSA) were assessed over the one week period. The MRSA and MSSA persistent carrier prevalence followed opposite directions in farmers as compared to family members. For MRSA persistent carriage the prevalence in farmers (15.5%) was twice as high as in family members (7.6%). MSSA persistent carriage prevalence was three times higher in family members than in farmers (15.3% and 5.2%, respectively). Regarding *S. aureus*, there were not significant differences between the subpopulations of farmers and family members and 22.8% of all individuals were persistently carrying the bacteria, 29.6% were intermittent carriers and the remaining 47.6% never carried *S. aureus*. Supplemental Table 1 shows these longitudinal carriage patterns in more detail.

### Microbiological status and persistent MRSA nasal carriage

CFU counts were determined in 42 participants from quantitative nasal swabs on day 0. Figure 1 shows the shape of the relationship between the probability of being a persistent MRSA nasal carrier and the log-transformed MRSA concentration (CFU/swab suspension). The median CFU count was 43.65 with an interquartile range (IQR) 5.01-1,096.48. In addition, the univariate logistic regression analysis in this population resulted in 1.68 times higher risk (95% Confidence Interval (CI)=1.34-2.10,  $P<0.001$ ) for persistent MRSA carriage per 10 CFU increase.

No MSSA was found in MRSA-positive samples at day 0. In order to obtain an estimation of the prevalence ratio (PR) for the outcome when MSSA is present at day 0, data was manipulated by placing a MSSA positive result for one of the persistent carriers. This way an adjusted PR of 0.14 (95% CI=0.02-1.06,  $P=0.06$ ) was obtained.

1  
2  
3  
4 People found positive for MRSA in throat swabs at day 0 were at higher risk for being  
5 persistent nasal carriers (adjusted PR=12.2, 95%CI=5.2-28.8, P<0.0001). The spearman  
6 correlation coefficient between this variable and the outcome was 0.6 (P<0.0001).  
7

### 8 **Univariate and multivariate analysis for persistent MRSA nasal carriage**

9

10 Crude and age-sex-adjusted PRs in determinants meeting the specified criteria are  
11 presented in Table 1. Sex and smoking habits were not clearly associated with the outcome  
12 (P>0.2). Because these variables together with age are considered potential confounders,  
13 sensitivity analysis was performed with smoking habits added to sex and age for adjustment.  
14 This did not result in significant changes in estimates (results not shown) when compared to  
15 adjustment without smoking habits.  
16

17 Statistically significant risk factors for persistent MRSA carriage were identified (table  
18 2). Pet ownership showed a PR of 2.7 (P=0.05). The number of working hours per week in  
19 the farm was positively associated with the outcome (adjusted PR=2.5 expressed per 20  
20 hours/week increase, P=0.001). An increasing probability for MRSA persistent carriage with  
21 number of hours working in the farm was also demonstrated through semiparametric  
22 regression modelling (Supplemental Figure 3). Administration of antimicrobials to calves  
23 through milk and injection in the past month preceding sampling was also a significant risk  
24 factor (adjusted PR= 3.4, P=0.01). Other associations with the outcome did not show  
25 statistical significance. These include protective factors such as people living on farms with a  
26 changing room available (adjusted PR=0.5, P=0.07) or on farms where clean towels are used  
27 after work (adjusted PR=0.6, P=0.11) and risk factors, such as people living in farms where  
28 baby boxes are cleaned at the beginning of the production cycle (adjusted PR=1.3, P=0.54).  
29 Other determinants such as the prevalence of MRSA in animals at the farm level did not  
30 show an association with persistent human MRSA carriage (PR=1.0, 95%CI=1.0-1.0,  
31 P=0.96). There was also no association found with variables regarding individual health  
32 status.  
33  
34  
35

36 Results from the multiple logistic regression analysis are presented in Table 2. In model  
37 A, all variables meeting the described criteria were eligible to entry. In this model, number of  
38 working hours per week showed the most significant association with persistent MRSA  
39 carriage (PR=1.8 expressed per 20 hours/week increase, P<0.0001). Because this variable  
40 was a very strong determinant, as a result of which potential tasks were not retained, a model  
41 was explored (model B) without the number of working hours. In consequence, stable  
42 management (sorting calves) was retained in the final model B with a statistically significant  
43 PR of 3.1 (P=0.03). In both multivariate models, the presence of cats on the farm was  
44 significantly associated with the outcome (PR=2.8, P=0.01 in model A and PR=2.6, P=0.04  
45 in model B).  
46  
47

48 Specific tasks on the farm were adjusted for number of working hours in a bivariate  
49 analysis and the estimates obtained were not statistically significant. Only stable management  
50 remained positively associated with the outcome with a PR of 2.5 (95%CI=0.7-9.6; P=0.17);  
51 however, administration of antibiotics in the month before sampling showed no association  
52 with a PR of 1.1 (95%CI=0.2-5.9; P=0.91).  
53  
54

55 Table 1. Crude and adjusted for sex and age prevalence ratios (PR) for nasal MRSA  
56 persistent carriage in 195 veal calf farmers and household members from 51 farms.  
57  
58  
59  
60



| Determinant                                     | Category | N   | No. Persistent carriers <sup>a</sup><br>(prevalence %) | Mean<br>(range) | PR  | 95% CI                | PR <sup>b</sup><br>Adj | 95% CI               |
|-------------------------------------------------|----------|-----|--------------------------------------------------------|-----------------|-----|-----------------------|------------------------|----------------------|
| General characteristics:                        |          |     |                                                        |                 |     |                       |                        |                      |
| Sex                                             | Male     | 103 | 9 (8.7)                                                | -               | 1   | -                     | -                      | -                    |
|                                                 | Female   | 92  | 11 (12.0)                                              | -               | 1.4 | 0.6-3.2               | -                      | -                    |
| Age                                             | -        | 195 | -                                                      | 30 (0.1-81)     | 1.0 | 1.0-1.0**             | -                      | -                    |
| per 10 years increase                           | -        | 195 | -                                                      | -               | 1.3 | 1.1-1.6**             | -                      | -                    |
| Farm and household characteristics:             |          |     |                                                        |                 |     |                       |                        |                      |
| Presence of sheep in farm                       | No       | 149 | 12 (8.1)                                               | -               | 1   | -                     | 1                      | -                    |
|                                                 | Yes      | 46  | 8 (17.4)                                               | -               | 2.2 | 1.1-4.5*              | 2.4                    | 1.2-4.8*             |
| Presence of cats on farm                        | No       | 96  | 5 (5.2)                                                | -               | 1   | -                     | 1                      | -                    |
|                                                 | Yes      | 99  | 15 (15.2)                                              | -               | 3.0 | 1.2-7.1*              | 2.7                    | 1.1-6.6*             |
| Presence of pets                                | No       | 74  | 4 (5.4)                                                | -               | 1   | -                     | 1                      | -                    |
|                                                 | Yes      | 121 | 16 (13.2)                                              | -               | 2.7 | 1.0-7.4*              | 2.6                    | 1.0-6.7 <sup>t</sup> |
| Tasks performed last 7 days <sup>c</sup> :      |          |     |                                                        |                 |     |                       |                        |                      |
| Sorting calves (stable management)              | No       | 113 | 5 (4.4)                                                | -               | 1   | -                     | 1                      | -                    |
|                                                 | Yes      | 82  | 15 (18.3)                                              | -               | 4.2 | 1.5-12.3**            | 4.7                    | 1.3-16.8*            |
| Healthcare / control <sup>d</sup>               | No       | 132 | 9 (6.8)                                                | -               | 1   | -                     | 1                      | -                    |
|                                                 | Yes      | 63  | 11 (17.5)                                              | -               | 2.6 | 1.1-6.1*              | 2.3                    | 0.8-7.3              |
| Feeding calves                                  | No       | 72  | 2 (2.8)                                                | -               | 1   | -                     | 1                      | -                    |
|                                                 | Yes      | 123 | 18 (14.6)                                              | -               | 7.2 | 0.9-58.6 <sup>l</sup> | 5.4                    | 0.6-52.3             |
| Work at farm, hygiene cleaning and disinfection |          |     |                                                        |                 |     |                       |                        |                      |
| Administration of antibiotics during last month | No       | 131 | 8 (6.1)                                                | -               | 1   | -                     | 1                      | -                    |
|                                                 | Yes      | 64  | 12 (18.8)                                              | -               | 3.2 | 1.4-7.1**             | 3.4                    | 1.3-9.1*             |
| # working hours per week                        | -        | 195 | -                                                      | 16.5 (0-80)     | 1.0 | 1.0-1.0***            | 1.0                    | 1.0-1.1**            |
| per 20 hours increase                           | -        | -   | -                                                      | -               | 1.8 | 1.4-2.4***            | 2.5                    | 1.4-4.2**            |
| Clean towel                                     | No       | 45  | 7 (16.7)                                               | -               | 1   | -                     | 1                      | -                    |
|                                                 | Yes      | 150 | 13 (8.67)                                              | -               | 0.6 | 0.3-1.3               | 0.6                    | 0.3-1.1              |
| Changing room available                         | No       | 18  | 3 (16.7)                                               | -               | 1   | -                     | 1                      | -                    |
|                                                 | Yes      | 177 | 17 (9.7)                                               | -               | 0.6 | 0.3-1.2               | 0.5                    | 0.2-1.0 <sup>t</sup> |
| Cleaning of baby boxes                          | No       | 184 | 18 (9.8)                                               | -               | 1   | -                     | 1                      | -                    |
|                                                 | Yes      | 11  | 2 (18.2)                                               | -               | 1.9 | 1.0-3.5*              | 1.3                    | 0.6-2.8              |

<sup>a</sup> A person is considered a persistent carrier when all nasal swabs at days 0, 4 and 7 are positive for MRSA.

<sup>b</sup> Prevalence ratios adjusted for sex and age.

<sup>c</sup> Tasks performed in the week before time 0.

<sup>d</sup> The task healthcare and control includes the administration of antibiotics.

<sup>t</sup> Nonsignificant trend (P-value 0.05-0.10). \* P-value 0.01-0.05 \*\* P-value 0.0001-0.01. \*\*\* P-value <0.0001.

Table 2. Results from multiple logistic regression analysis for nasal MRSA persistent carriage in veal calf farmers and their household members (N=195). Model A: final model in which all variables meeting eligibility criteria were added to the automatic selection. Model B: final model in which all the variables in model A were added to the automatic selection except # working hours.

| Determinant                                       | Category | PR   | 95% CI    | P-value |
|---------------------------------------------------|----------|------|-----------|---------|
| <b>MODEL A</b>                                    |          |      |           |         |
| # working hours per week<br>per 20 hours increase | -        | 1.03 | 1.02-1.04 | 0.000*  |
|                                                   | -        | 1.81 | 1.49-2.19 | -       |
| Presence of cats on farm                          | No       | 1    | -         | -       |
|                                                   | Yes      | 2.80 | 1.23-6.36 | 0.014*  |
| Presence of sheep in farm                         | No       | 1    | -         | -       |
|                                                   | Yes      | 1.83 | 0.89-3.77 | 0.100   |
| Changing room available                           | No       | 1    | -         | -       |
|                                                   | Yes      | 0.48 | 0.20-1.13 | 0.094   |
| Cleaning of baby boxes                            | No       | 1    | -         | -       |
|                                                   | Yes      | 3.96 | 1.59-9.90 | 0.003*  |
| <b>MODEL B</b>                                    |          |      |           |         |
| Age<br>per 10 years increase                      | -        | 1.02 | 1.00-1.05 | 0.037*  |
|                                                   | -        | 1.26 | 1.01-1.56 | -       |
| Presence of cats on farm                          | No       | 1    | -         | -       |
|                                                   | Yes      | 2.57 | 1.05-6.33 | 0.040*  |
| Presence of sheep in farm                         | No       | 1    | -         | -       |
|                                                   | Yes      | 1.78 | 0.88-3.59 | 0.107   |
| Sorting calves                                    | No       | 1    | -         | -       |
|                                                   | Yes      | 3.10 | 1.14-8.47 | 0.027*  |

\* P-value statistically significant (i.e. < 0.05).

### Contamination of the environment with MRSA

At the beginning of the production cycle, MRSA was detected in only 4.6% of all EDCs placed in stables and on 6 farms. Differences in environmental exposure across persistent, intermittent and non-carrier farms were not significant (Table 3). None of the EDCs placed inside the houses were found to be positive for MRSA.

In week 12, MRSA was detected in 50.6% of all EDCs placed in the stables and on 39 farms. There was a significantly higher proportion of EDCs positive for MRSA and a trend for higher CFU counts per EDC in farms where MRSA carriers were found in week 12 (Table 4). Stratified analysis was performed in farmers and family members. The same trends

for higher MRSA environmental load were found only in farmers, however not statistically significant (results not shown). MRSA was found in EDCs from 10 houses (Table 4).

The mean pooled MRSA prevalence in calves rose from 18.7% at day 0 to 46% in week 12. A simple linear regression between the EDC MRSA levels (maximum log-transformed MRSA CFU/EDC per farm) and animal prevalence showed a positive and significant association ( $\beta=0.006$ ,  $P=0.0014$ ). Furthermore, there was a 60% increased probability for detecting a MRSA-positive EDC in farms where animal prevalence in week 12 was above the mean ( $PR=1.6$ ,  $95\%CI=1.09-2.38$ ,  $P=0.02$ ). With regards to human carriage in relation to animal prevalence, no association between being a MRSA carrier and the prevalence in calves was found on day 0. However, a significant association was found at the last sampling moment. Individuals from farms with MRSA prevalence in calves above the mean were at 2 times higher risk for carrying MRSA in week 12 ( $PR=2.12$ ,  $95\%CI=1.12-4.01$ ,  $P=0.02$ ).

Table 3. Environmental MRSA samples (EDCs) taken in stables at the beginning of the production cycle in 51 farms with persistent, intermittent or non-MRSA carrying veal calf farmers and household members.

|                                                         | Persistent <sup>a</sup> | Intermittent <sup>a</sup> | Non-carrier <sup>a</sup> | P-value <sup>b</sup> |
|---------------------------------------------------------|-------------------------|---------------------------|--------------------------|----------------------|
| No. farms with MRSA positive EDCs / total no. farms (%) | 2/18 (11.11)            | 2/12 (16.67)              | 2/21 (9.52)              | 0.86                 |
| No. MRSA positive EDCs / total no. EDCs (%)             | 2/69 (2.90)             | 4/47 (8.51)               | 3/78 (3.85)              | 0.38                 |
| GM MRSA CFU/EDC (p-value) <sup>c</sup>                  | <1 (0.75)               | <1 (0.29)                 | <1 (ref.)                | -                    |

<sup>a</sup> A farm was categorised as persistent when there was at least one persistent carrier living and/or working on the farm, non-carrier farms had no individual positive for MRSA in nasal swabs on days 0,4,7 and intermittent farms were the remaining.

<sup>b</sup> P-values among proportions were calculated with Fisher's exact test. Mean values had not an overall assigned p-value since they could not be tested with non-parametric tests.

<sup>c</sup> Geometric mean (antilogged results from tobit regression). P-values indicate the difference with the reference category (non-carrier farm).

Table 4. Environmental MRSA samples (EDCs) taken in stables on week 12 in 49 farms with MRSA carriers and non-carriers.

|                                                            | Location<br>EDC    | Carrier farms <sup>a</sup> | Non-carrier farms <sup>a</sup> | P-value <sup>b</sup> |
|------------------------------------------------------------|--------------------|----------------------------|--------------------------------|----------------------|
| No. farms with MRSA positive<br>EDCs / total no. farms (%) | Stable             | 22/25 (88.00)              | 17/24 (70.83)                  | 0.14                 |
|                                                            | House              | 3/25 (12.00)               | 7/24 (29.17)                   | 0.17                 |
| No. MRSA positive EDCs /<br>total no. EDCs (%)             | Stable             | 54/90 (60.00)              | 35/86 (40.70)                  | 0.01                 |
|                                                            | House <sup>d</sup> | -                          | -                              | -                    |
| GM <sup>c</sup> MRSA CFU/EDC                               | Stable             | 27.54                      | 16.98                          | 0.06                 |
|                                                            | House              | 2.29                       | 5.50                           | 0.29                 |

<sup>a</sup> A farm was categorised as carrier when there was at least one carrier on week 12 living and/or working on the farm, non-carrier farms were the remaining.

<sup>b</sup> P-values among proportions were calculated with Chi-square test and Fisher's exact test when 20% of the expected cell values were <5. P-values for the GM indicate the difference with the reference category (non-carrier farms).

<sup>c</sup> Geometric mean (antilogged results from tobit regression).<sup>d</sup> There was one EDC per house, thus the values in this line are the same as the ones in "No. farms with MRSA positive EDCs / total no. farms (%)".

## DISCUSSION

The associations found during the first week after arrival of the animals on the farm show that the level of exposure to veal calves and the presence of potential animal reservoirs (pets, free-ranging farm cats and sheep) are risk factors for persistent MRSA carriage in farmers and household members. Additionally, persistent MRSA carriers seem to have a different microbiological profile when compared to intermittent and non-carriers, which is characterised by higher MRSA CFU counts, presence of MRSA in throat and absence of MSSA. This study shows that as the production cycle advances, there is a rise in MRSA prevalence in calves that leads to higher contamination of the air and higher probability for human MRSA carriage.

Descriptive results confirm that high MRSA carriage prevalence (17.6%) is observed among individuals living on farms, as seen in other studies.<sup>(2,16)</sup> This percentage represents a carriage burden in countries where estimated MRSA prevalence in community is below 1% such as the Netherlands and Scandinavian countries. The large difference in prevalence between farmers and family members can be attributed to the different intensity of animal contact and is again an indication of a low LA-MRSA human-to-human transmission.<sup>(16,22)</sup> The carriage patterns of *S. aureus* presented are similar to those described by Wertheim and co-authors,<sup>(23)</sup> in which they found percentages of 20%, 30% and 50% for persistent, intermittent and non-carriers respectively among healthy individuals. The lower MRSA persistent carrier prevalence in the total study population (9.7%) as compared to the average cross-sectional MRSA prevalence (17.6%) indicates that carriage of LA-MRSA is fleeting and varies within individuals.

1  
2  
3  
4 Due to culturing techniques, MSSA was detected with difficulty when there was a  
5 predominant MRSA growth. The possible underestimation of MSSA asks for a cautious  
6 interpretation of the results. Nevertheless it is remarkable that no persistent MRSA carrier  
7 was positive for MSSA at day 0. This suggests that the presence of MSSA in the nose might  
8 be a protective factor for MRSA persistent carriage. Moreover, a negative association  
9 between MSSA and MRSA has been recently found in a study.(14)  
10

11 In the first week of the production cycle the MRSA environmental load was lower and it  
12 can be assumed that nasal contamination with MRSA-containing dust particles and transient  
13 mechanical carriage was less likely to occur as compared to further time points in the  
14 production cycle. As shown in figure 2, there is an increased probability for persistent MRSA  
15 carriage associated with higher MRSA CFU counts in nasal swabs. Moreover, isolation of  
16 MRSA in throat swabs at day 0 was significantly associated to the outcome (PR=12.2). These  
17 findings suggest that there might be a true colonization in persistent MRSA carriers as  
18 defined here. Furthermore a recent study has shown that ST398 is capable of adequately  
19 competing for a niche with a human strain and survives in the human nose for longer  
20 periods.(24)  
21  
22

23 Direct association between administration of antibiotics and MRSA persistent carriage in  
24 farmers and their family members, as defined in our study, was shown in univariate results  
25 (PR=3.2). It is known that when antimicrobials are administered to animals, substantial  
26 quantities of these drugs can be present in manure, on surfaces of animal houses and in dust  
27 as a potential risk source.(25) We could hypothesize that aspiration of dust containing  
28 antibiotics, either from a contaminated environment or directly from a powder formulation,  
29 would exert a selective pressure in the anterior nares leading to higher risk for MRSA  
30 persistent carriage in people occupationally exposed. However, this association was not  
31 confirmed in multivariate models and it needs further exploration. Number of working hours  
32 and other tasks were correlated and may have more influence on persistent carriage. This was  
33 also shown when adjustment for number of working hours was done in a bivariate fashion.  
34  
35

36 This study supports that close contact with animals is a major risk factor for persistent  
37 LA-MRSA carriage in humans. This is made clear by the final set of variables retained in the  
38 multivariate models. The number of working hours was most strongly associated with  
39 persistent carriage as indicated by the model A and by the smoothed exposure-response  
40 relation shown in the Supplemental Figure 3. Moreover, when the number of working hours  
41 was removed for model B, another variable representing close contact with animals (stable  
42 management) was retained by the backward procedure.  
43  
44

45 In recent years, several reports have suggested a potential role for pet animals,  
46 specifically cats and dogs, in household MRSA transmission and relapse of human MRSA  
47 infections. This transmission seems to be of anthrozoönotic origin. Thus, pets can acquire  
48 human strains from humans and they can cause colonization or infection in human  
49 cohabitants.(26-31) In most cases, the distribution of the clones in pet animals has mirrored  
50 the epidemiology of human clones and mainly shared hospital-associated (HA) and  
51 community-associated (CA) MRSA strains have been reported. It is remarkable that in this  
52 study, having a pet in the household was strongly associated with MRSA carriage in veal  
53 farmers and household members. Moreover, there is a demonstrated spread of LA-MRSA  
54 between animal species, humans and the farm environment.(32) In this study the presence of  
55 free-ranging farm cats and sheep were significantly associated and retained in multivariate  
56 models. These animals might represent an intermittent source of LA-MRSA that might  
57  
58  
59  
60

1  
2  
3 contribute to LA-MRSA persistent carriage in humans. However, no other animals apart from  
4 veal calves were sampled in this study.  
5  
6

7 Other farm characteristics and hygiene practices were also associated with persistent  
8 MRSA carriage, although not significantly. Having a changing room in the farm and using a  
9 clean towel after working in the stables were found as protective factors. This might give a  
10 direction to specific preventive strategies. On the other hand, cleaning of baby boxes at the  
11 beginning of the production cycle was a risk factor for the outcome (PR=4 in multivariate  
12 model A and PR=1.9 in univariate analysis). This hygiene practise could give rise to  
13 transitory spread in the air of accumulated MRSA.  
14

15 Environmental contamination with dust particles containing MRSA is much lower in veal  
16 calf farming as compared to pig farming and associations are less evident.(33) As shown in  
17 table 3, no difference in the environmental MRSA load was found across persistent,  
18 intermittent and non-carrier farms at the beginning of the production cycle. However, the  
19 two-fold rise in animal prevalence at the end of the study was associated with a considerably  
20 higher environmental MRSA load and a significantly higher proportion of MRSA-positive  
21 EDCs was found on farms with MRSA carriers on week 12. This finding supports that  
22 contamination of the environment plays a role in the acquisition of MRSA in people living or  
23 working in the farm.  
24  
25

26 A possible limitation of the study is the self-sampling of nose and throat by individuals  
27 which might be lacking of accuracy for MRSA detection. This is however believed to be a  
28 minor bias. A recent pilot study has shown high degree of agreement between self-samples  
29 and investigator samples (93% agreement, kappa 0.85 for nasal swabs and 83% agreement,  
30 kappa 0.60 for throat swabs).(34) Another limitation is the previously described  
31 underestimation of MSSA presence but this is of negligible impact in the results because  
32 detection of MRSA and *S. aureus* remains unaffected. Finally, there were many missing  
33 values in some variables and they were excluded from the analysis. There were 5 individuals  
34 (/211=2%) with missing nasal samples but sensitivity analysis did not reveal significant  
35 changes in estimates.  
36  
37

38 In conclusion, people living and/or working in veal calf farms who persistently carry  
39 MRSA seem to be defined by a differential microbiological profile. The associations found  
40 here with the presence of free-ranging farm cats and multispecies farming ask for improved  
41 internal and external biosecurity measures. Detailed molecular-epidemiological analysis of  
42 MRSA specimens on the farm in various animal species and humans is also essential to  
43 identify reservoirs and transmission routes for LA-MRSA. Finally, environmental  
44 contamination with MRSA has to be thoroughly studied to assess the extent of its importance  
45 in the transmission of MRSA within the veal-calf farming community.  
46  
47

## 48 ACKNOWLEDGEMENTS

49

50 The authors wish to thank all farmers for their participation and all field workers and  
51 laboratory assistants, especially Isabella Oosting-Van Schothorst, Arjen Timmerman and  
52 Marian Broekhuizen-Stins.  
53  
54  
55  
56  
57  
58  
59  
60

## FUNDING

The POM project was funded by The Netherlands Organization for Health Research and Development (ZonMw) (grant number 125020009), the Product Boards for Livestock Meat and Eggs and the Dutch Ministry of Agriculture Nature and Food Quality.

## COMPETING INTERESTS

None declared

## CONTRIBUTORSHIP

Alejandro Dorado-García performed the statistical analyses and interpretation of the data, and drafted the manuscript. Marian EH Bos collected the data, contributed to the interpretation of the data, and contributed to the critical revision of the manuscript. Haitske Graveland participated in the conception and design of the study, collected the data and contributed to the critical revision of the manuscript. Brigitte AGL van Cleef and Jan AJW Kluytmans contributed to the critical revision of the manuscript. Koen M Verstappen carried out the laboratory analysis. Jaap A Wagenaar conceived the study and contributed to the critical revision of the manuscript. Dick JJ Heederik conceived the study and contributed to the interpretation of the data and the critical revision of the manuscript. All authors read and approved the final manuscript.

## DATA SHARING

Data will not be publicly accessible.  
Interested individuals may contact the authors

## REFERENCES

- (1) Fitzgerald JR. Livestock-associated *Staphylococcus aureus*: origin, evolution and public health threat. *Trends Microbiol* 2012;20:192-8.
- (2) Graveland H, Duim B, van Duijkeren E, et al. Livestock-associated methicillin-resistant *Staphylococcus aureus* in animals and humans. *Int J Med Microbiol* 2011;301:630-4.
- (3) van Duijkeren E, Box AT, Heck ME, et al. Methicillin-resistant staphylococci isolated from animals. *Vet Microbiol* 2004;103:91-7.
- (4) Tiemersma EW, Bronzwaer SL, Lyytikäinen O, et al. Methicillin-resistant *Staphylococcus aureus* in Europe, 1999-2002. *Emerg Infect Dis* 2004;10:1627-34.
- (5) van Cleef BA, Monnet DL, Voss A, et al. Livestock-associated methicillin-resistant *Staphylococcus aureus* in humans, Europe. *Emerg Infect Dis* 2011;17:502-5.
- (6) van den Broek IV, van Cleef BA, Haenen A, et al. Methicillin-resistant *Staphylococcus aureus* in people living and working in pig farms. *Epidemiol Infect* 2009;137:700-8.

- 1  
2  
3  
4 (7) van der Mee-Marquet N, Francois P, Domelier-Valentin AS, et al. Emergence of unusual  
5 bloodstream infections associated with pig-borne-like *Staphylococcus aureus* ST398 in France. *Clin*  
6 *Infect Dis* 2011;52:152-3.  
7  
8 (8) Rasigade JP, Laurent F, Hubert P, et al. Lethal necrotizing pneumonia caused by an ST398  
9 *Staphylococcus aureus* strain. *Emerg Infect Dis* 2010;16:1330.  
10  
11 (9) Catry B, Van Duijkeren E, Pomba MC, et al. Reflection paper on MRSA in food-producing and  
12 companion animals: epidemiology and control options for human and animal health. *Epidemiol Infect*  
13 2010;138:626-44.  
14  
15 (10) van Cleef BA, Graveland H, Haenen AP, et al. Persistence of livestock-associated methicillin-  
16 resistant *Staphylococcus aureus* in field workers after short-term occupational exposure to pigs and  
17 veal calves. *J Clin Microbiol* 2011;49:1030-3.  
18  
19 (11) Bootsma MC, Wassenberg MW, Trapman P, et al. The nosocomial transmission rate of animal-  
20 associated ST398 methicillin-resistant *Staphylococcus aureus*. *J R Soc Interface* 2011;8:578-84.  
21  
22 (12) Lekkerkerk WS, van de Sande-Bruinsma N, van der Sande MA, et al. Emergence of MRSA of  
23 unknown origin in the Netherlands. *Clin Microbiol Infect* 2012;18:656-61.  
24  
25 (13) Porphyre T, Giotis ES, Lloyd DH, et al. A metapopulation model to assess the capacity of spread  
26 of methicillin-resistant *Staphylococcus aureus* ST398 in humans. *PLoS One* 2012;7:e47504.  
27  
28 (14) Graveland H, Wagenaar JA, Bergs K, et al. Persistence of livestock associated MRSA CC398 in  
29 humans is dependent on intensity of animal contact. *PLoS One* 2011;6:e16830.  
30  
31 (15) Bos ME, Graveland H, Portengen L, et al. Livestock-associated MRSA prevalence in veal calf  
32 production is associated with farm hygiene, use of antimicrobials, and age of the calves. *Prev Vet*  
33 *Med* 2012;105:155-9.  
34  
35 (16) Graveland H, Wagenaar JA, Heesterbeek H, et al. Methicillin resistant *Staphylococcus aureus*  
36 ST398 in veal calf farming: human MRSA carriage related with animal antimicrobial usage and farm  
37 hygiene. *PLoS One* 2010;5:e10990.  
38  
39 (17) Graveland H, Wagenaar JA, Verstappen KM, et al. Dynamics of MRSA carriage in veal calves:  
40 A longitudinal field study. *Prev Vet Med* 2012;107:180-6.  
41  
42 (18) Noss I, Wouters IM, Visser M, et al. Evaluation of a low-cost electrostatic dust fall collector for  
43 indoor air endotoxin exposure assessment. *Appl Environ Microbiol* 2008;74:5621-7.  
44  
45 (19) Kilic A, Muldrew K, Tang Y, et al. Triplex real-time polymerase chain reaction assay for  
46 simultaneous detection of *Staphylococcus aureus* and coagulase-negative staphylococci and  
47 determination of methicillin resistance directly from positive blood culture bottles. *Diagn Microbiol*  
48 *Infect Dis* 2010;66:349-55.  
49  
50 (20) Francois P, Pittet D, Bento M, et al. Rapid detection of methicillin-resistant *Staphylococcus*  
51 *aureus* directly from sterile or nonsterile clinical samples by a new molecular assay. *J Clin Microbiol*  
52 2003;41:254-60.  
53  
54 (21) Graveland H, van Duijkeren E, van Nes A, et al. Evaluation of isolation procedures and  
55 chromogenic agar media for the detection of MRSA in nasal swabs from pigs and veal calves. *Vet*  
56 *Microbiol* 2009;139:121-5.  
57  
58  
59  
60



- 1  
2  
3  
4 (22) Wassenberg MW, Hopmans TE, Troelstra A, et al. Methicillin-resistant *Staphylococcus aureus*  
5 of livestock origin in Dutch hospitals: high-risk patients need only to be investigated if admitted to  
6 hospital. *Ned Tijdschr Geneeskd* 2008;152:2681-8.  
7  
8 (23) Wertheim HF, Melles DC, Vos MC, et al. The role of nasal carriage in *Staphylococcus aureus*  
9 infections. *The Lancet Infectious Diseases* 2005;5:751-62.  
10  
11 (24) Slingerland BC, Tavakol M, McCarthy AJ, et al. Survival of *Staphylococcus aureus* ST398 in the  
12 Human Nose after Artificial Inoculation. *PLoS One* 2012;7:e48896.  
13  
14 (25) Hamscher G, Pawelzick HT, Sczesny S, et al. Antibiotics in dust originating from a pig-fattening  
15 farm: a new source of health hazard for farmers? *Environ Health Perspect* 2003;111:1590-4.  
16  
17 (26) Bender JB, Waters KC, Nerby J, et al. Methicillin-resistant *Staphylococcus aureus* (MRSA)  
18 isolated from pets living in households with MRSA-infected children. *Clin Infect Dis* 2012;54:449-  
19 50.  
20  
21 (27) Haenni M, Saras E, Chatre P, et al. A USA300 variant and other human-related methicillin-  
22 resistant *Staphylococcus aureus* strains infecting cats and dogs in France. *J Antimicrob Chemother*  
23 2012;67:326-9.  
24  
25 (28) Bramble M, Morris D, Tolomeo P, et al. Potential role of pet animals in household transmission  
26 of methicillin-resistant *Staphylococcus aureus*: a narrative review. *Vector Borne Zoonotic Dis*  
27 2011;11:617-20.  
28  
29 (29) Coughlan K, Olsen KE, Boxrud D, et al. Methicillin-resistant *Staphylococcus aureus* in Resident  
30 Animals of a Long-term Care Facility. *Zoonoses and Public Health* 2010;57:220-6.  
31  
32 (30) Sing A, Tuschak C, Hörmansdorfer S. Methicillin-Resistant *Staphylococcus aureus* in a Family  
33 and Its Pet Cat. *N Engl J Med* 2008;358:1200-1.  
34  
35 (31) Cefai C, Ashurst S, Owens C. Human carriage of methicillin-resistant *Staphylococcus aureus*  
36 linked with pet dog. *Lancet* 1994;344:539-40.  
37  
38 (32) Pletinckx LJ, Verheghe M, Crombe F, et al. Evidence of possible methicillin-resistant  
39 *Staphylococcus aureus* ST398 spread between pigs and other animals and people residing on the same  
40 farm. *Prev Vet Med* 2012;109:293-303  
41  
42 (33) van Cleef BA, van Benthem B, Verkade E, et al. Dynamics of MRSA carriage in pig farmers: a  
43 prospective cohort study. Submitted 2013.  
44  
45 (34) van Cleef BA, van Rijen M, Ferket M, et al. Self-sampling is appropriate for detection of  
46 *Staphylococcus aureus*: a validation study. *Antimicrob Resist Infect Control* 2012;1:34.  
47  
48  
49  
50  
51  
52  
53  
54  
55  
56  
57  
58  
59  
60

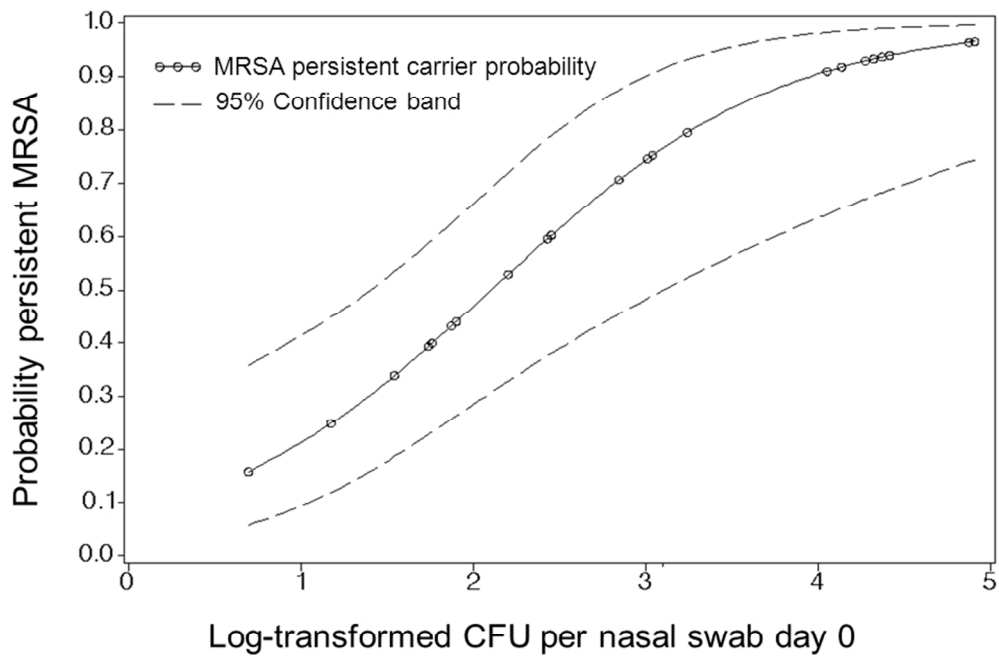

Figure 1. Probability of nasal MRSA persistent carriage and its relationship with the log-transformed CFU from MRSA positive nasal swabs at day 0. Nonparametric regression modelling.  
254x190mm (96 x 96 DPI)

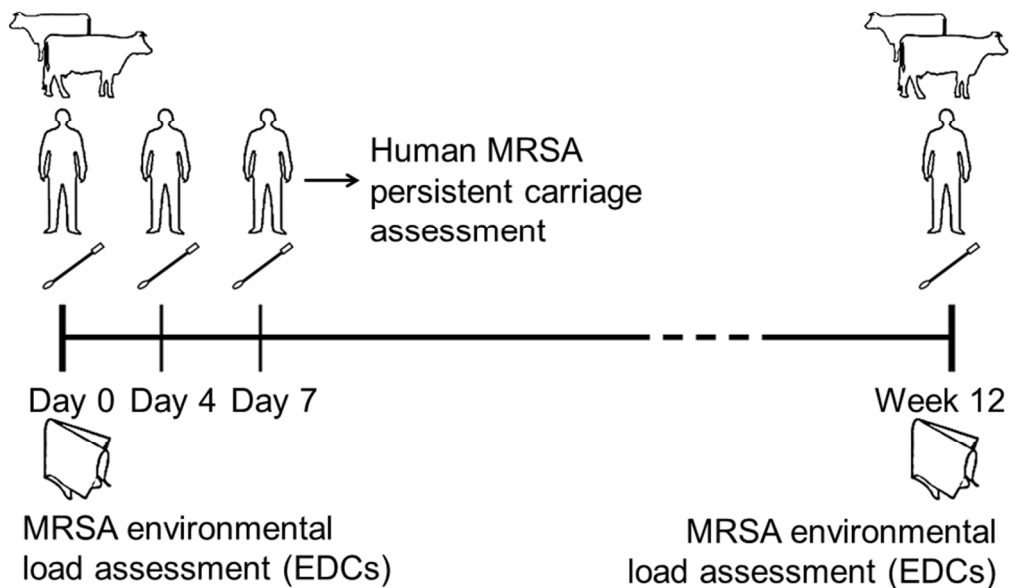

Supplemental Figure 1. Schematic overview of the study design.  
254x190mm (96 x 96 DPI)

Review only

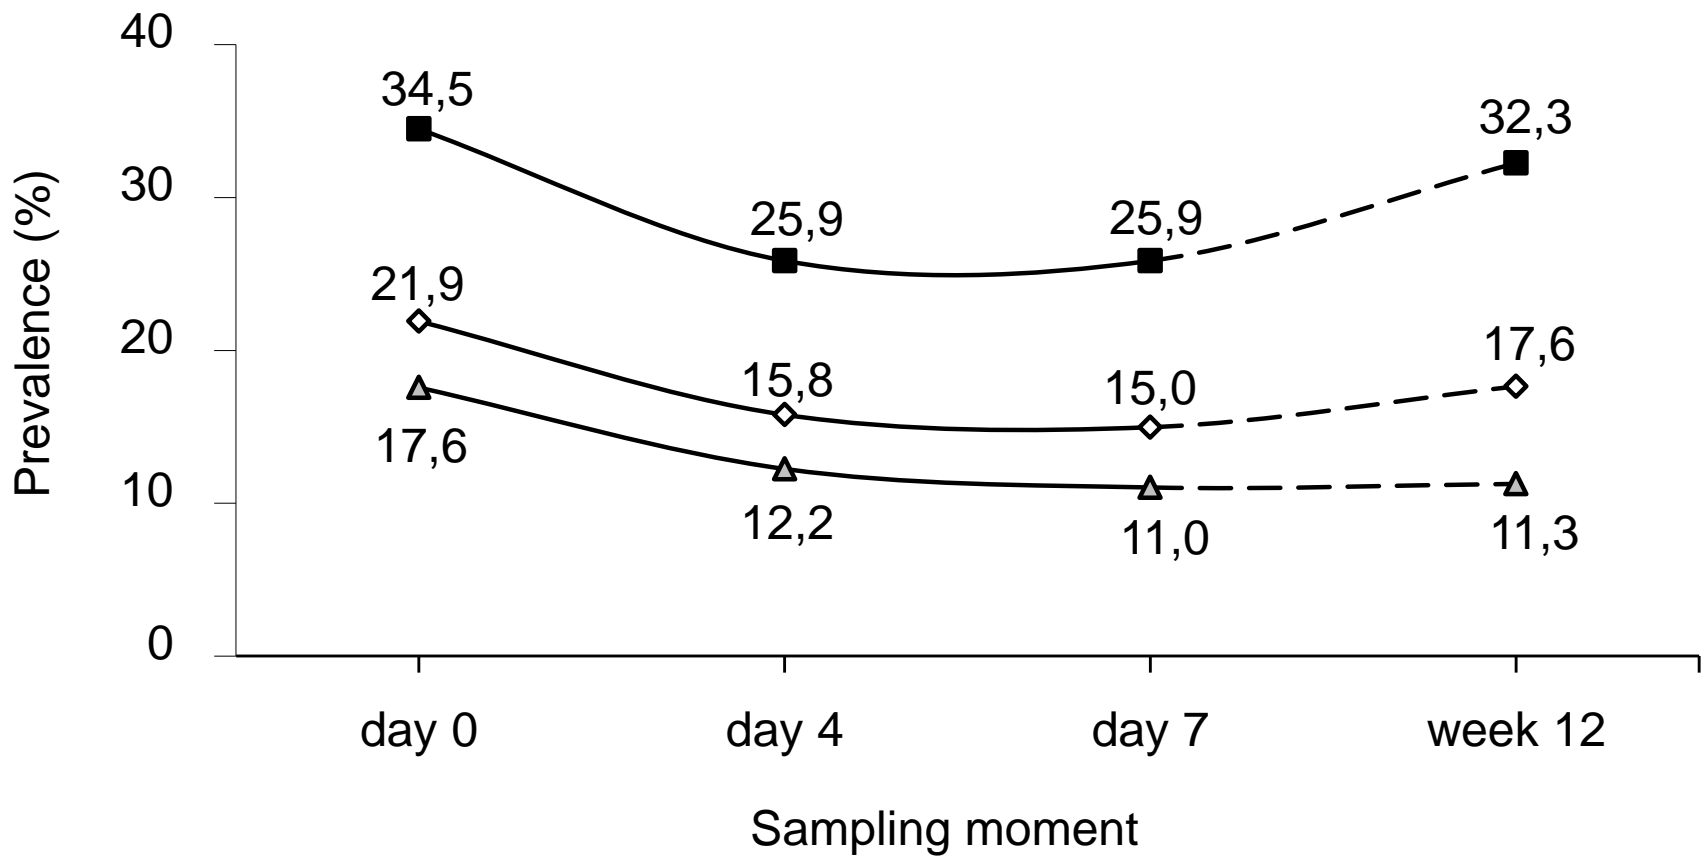

- ◇ MRSA in farmers and family members
- MRSA in farmers
- △ MRSA in family members

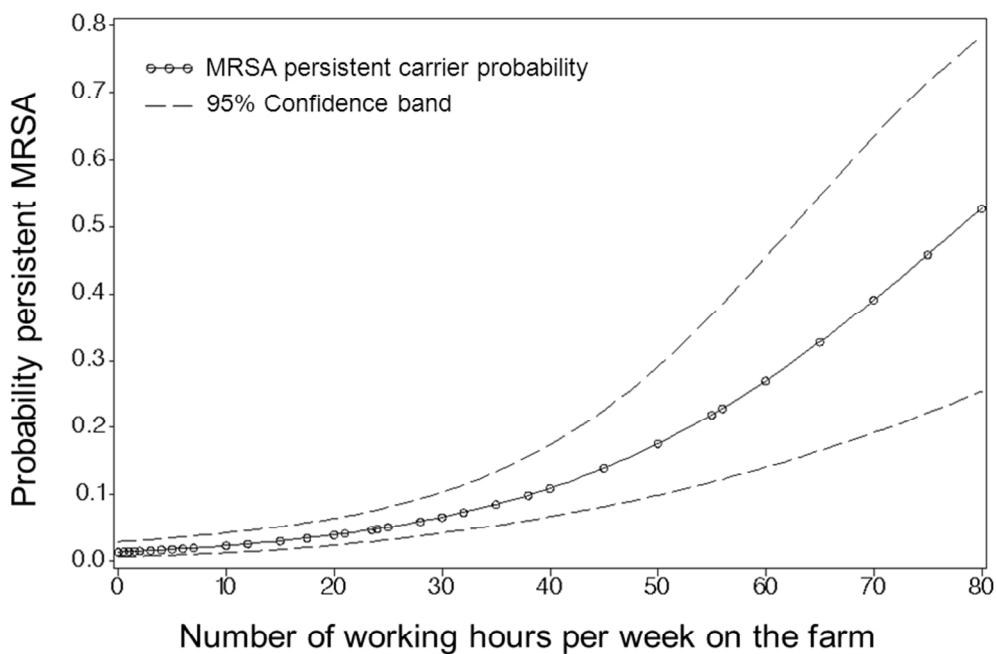

Supplemental Figure 3. Probability of nasal MRSA persistent carriage and its relationship with number of working hours in the farm. Semiparametric regression modelling setting sex and age as parametric components for adjustment.  
254x190mm (96 x 96 DPI)

Peer Review Only

Supplemental Table 1. Patterns for one week nasal carriage of *S. aureus*, MRSA and MSSA in the total study population and subpopulations of farmers, household members and employees.

|                               | No. persistent (%) <sup>a</sup> | No. intermittent (%) <sup>a</sup> | No. non-carrier (%) <sup>a</sup> | Total no. |
|-------------------------------|---------------------------------|-----------------------------------|----------------------------------|-----------|
| MRSA in nose:                 |                                 |                                   |                                  |           |
| Total population <sup>b</sup> | 20 (9.7)                        | 35 (17.0)                         | 151 (73.3)                       | 206       |
| Farmers                       | 9 (15.5)                        | 15 (25.9)                         | 34 (58.6)                        | 58        |
| Family members                | 11 (7.6)                        | 20 (13.9)                         | 113 (78.5)                       | 144       |
| Employees                     | 0 (0.0)                         | 0 (0.0)                           | 4 (100.0)                        | 4         |
| MSSA in nose:                 |                                 |                                   |                                  |           |
| Total population <sup>b</sup> | 25 (12.1)                       | 36 (17.5)                         | 145 (70.4)                       | 206       |
| Farmers                       | 3 (5.2)                         | 13 (22.4)                         | 42 (72.4)                        | 58        |
| Family members                | 22 (15.3)                       | 22 (15.3)                         | 100 (69.4)                       | 144       |
| Employees                     | 0 (0.0)                         | 1 (25.0)                          | 3 (75.0)                         | 4         |
| <i>S. aureus</i> in nose:     |                                 |                                   |                                  |           |
| Total population <sup>b</sup> | 47 (22.8)                       | 61 (29.6)                         | 98 (47.6)                        | 206       |
| Farmers                       | 14 (24.1)                       | 21 (36.2)                         | 23 (39.7)                        | 58        |
| Family members                | 33 (22.9)                       | 39 (27.1)                         | 72 (50.0)                        | 144       |
| Employees                     | 0 (0.0)                         | 1 (25.0)                          | 3 (75.0)                         | 4         |

<sup>a</sup> A person was persistent carrier when each of the nasal swabs collected on days 0, 4 and 7 was positive for MRSA; non-carriers had no positive swabs; intermittent carriers were the remaining persons.

<sup>b</sup> there were 5 missing values (total study population = 211).

STROBE Statement—checklist of items that should be included in reports of observational studies

|                           | Item No               | Recommendation                                                                                                                                                                                                                                                                                                                                                                                                                                                                                                                                                                                                                                                                                                                                        |
|---------------------------|-----------------------|-------------------------------------------------------------------------------------------------------------------------------------------------------------------------------------------------------------------------------------------------------------------------------------------------------------------------------------------------------------------------------------------------------------------------------------------------------------------------------------------------------------------------------------------------------------------------------------------------------------------------------------------------------------------------------------------------------------------------------------------------------|
| <b>Title and abstract</b> | 1 ✓                   | (a) Indicate the study's design with a commonly used term in the title or the abstract<br>(b) Provide in the abstract an informative and balanced summary of what was done and what was found                                                                                                                                                                                                                                                                                                                                                                                                                                                                                                                                                         |
| <b>Introduction</b>       |                       |                                                                                                                                                                                                                                                                                                                                                                                                                                                                                                                                                                                                                                                                                                                                                       |
| Background/rationale      | 2 ✓                   | Explain the scientific background and rationale for the investigation being reported                                                                                                                                                                                                                                                                                                                                                                                                                                                                                                                                                                                                                                                                  |
| Objectives                | 3 ✓                   | State specific objectives, including any prespecified hypotheses                                                                                                                                                                                                                                                                                                                                                                                                                                                                                                                                                                                                                                                                                      |
| <b>Methods</b>            |                       |                                                                                                                                                                                                                                                                                                                                                                                                                                                                                                                                                                                                                                                                                                                                                       |
| Study design              | 4 ✓                   | Present key elements of study design early in the paper                                                                                                                                                                                                                                                                                                                                                                                                                                                                                                                                                                                                                                                                                               |
| Setting                   | 5 ✓                   | Describe the setting, locations, and relevant dates, including periods of recruitment, exposure, follow-up, and data collection                                                                                                                                                                                                                                                                                                                                                                                                                                                                                                                                                                                                                       |
| Participants              | 6 ✓                   | (a) <i>Cohort study</i> —Give the eligibility criteria, and the sources and methods of selection of participants. Describe methods of follow-up <i>Forms and participants willing to participate</i><br><i>Case-control study</i> —Give the eligibility criteria, and the sources and methods of case ascertainment and control selection. Give the rationale for the choice of cases and controls<br><i>Cross-sectional study</i> —Give the eligibility criteria, and the sources and methods of selection of participants<br>(b) <i>Cohort study</i> —For matched studies, give matching criteria and number of exposed and unexposed<br><i>Case-control study</i> —For matched studies, give matching criteria and the number of controls per case |
| Variables                 | 7 ✓                   | Clearly define all outcomes, exposures, predictors, potential confounders, and effect modifiers. Give diagnostic criteria, if applicable                                                                                                                                                                                                                                                                                                                                                                                                                                                                                                                                                                                                              |
| Data sources/measurement  | 8* ✓                  | For each variable of interest, give sources of data and details of methods of assessment (measurement). Describe comparability of assessment methods if there is more than one group                                                                                                                                                                                                                                                                                                                                                                                                                                                                                                                                                                  |
| Bias                      | 9 ✓                   | Describe any efforts to address potential sources of bias                                                                                                                                                                                                                                                                                                                                                                                                                                                                                                                                                                                                                                                                                             |
| Study size                | 10                    | Explain how the study size was arrived at <i>Not reported in manuscript.</i>                                                                                                                                                                                                                                                                                                                                                                                                                                                                                                                                                                                                                                                                          |
| Quantitative variables    | 11 ✓                  | Explain how quantitative variables were handled in the analyses. If applicable, describe which groupings were chosen and why                                                                                                                                                                                                                                                                                                                                                                                                                                                                                                                                                                                                                          |
| Statistical methods       | 12 ✓<br>✓<br>✓<br>NA. | (a) Describe all statistical methods, including those used to control for confounding<br>(b) Describe any methods used to examine subgroups and interactions<br>(c) Explain how missing data were addressed<br>(d) <i>Cohort study</i> —If applicable, explain how loss to follow-up was addressed<br><i>Case-control study</i> —If applicable, explain how matching of cases and controls was addressed<br><i>Cross-sectional study</i> —If applicable, describe analytical methods taking account of sampling strategy<br>(e) Describe any sensitivity analyses                                                                                                                                                                                     |

Continued on next page

1  
2  
3  
4  
5  
6  
7  
8  
9  
10  
11  
12  
13  
14  
15  
16  
17  
18  
19  
20  
21  
22  
23  
24  
25  
26  
27  
28  
29  
30  
31  
32  
33  
34  
35  
36  
37  
38  
39  
40  
41  
42  
43  
44  
45  
46  
47  
48  
49  
50  
51  
52  
53  
54  
55  
56  
57  
58  
59  
60

| <b>Results</b>           |     |                                                                                                                                                                                                              |
|--------------------------|-----|--------------------------------------------------------------------------------------------------------------------------------------------------------------------------------------------------------------|
| Participants             | 13* | (a) Report numbers of individuals at each stage of study—eg numbers potentially eligible, examined for eligibility, confirmed eligible, included in the study, completing follow-up, and analysed            |
|                          | ✓   |                                                                                                                                                                                                              |
|                          | NA  | (b) Give reasons for non-participation at each stage                                                                                                                                                         |
|                          | NA  | (c) Consider use of a flow diagram                                                                                                                                                                           |
| Descriptive data         | 14* | (a) Give characteristics of study participants (eg demographic, clinical, social) and information on exposures and potential confounders                                                                     |
|                          | ✓   |                                                                                                                                                                                                              |
|                          |     | (b) Indicate number of participants with missing data for each variable of interest                                                                                                                          |
|                          |     | (c) <i>Cohort study</i> —Summarise follow-up time (eg, average and total amount)                                                                                                                             |
| Outcome data             | 15* | <i>Cohort study</i> —Report numbers of outcome events or summary measures over time                                                                                                                          |
|                          |     | <i>Case-control study</i> —Report numbers in each exposure category, or summary measures of exposure                                                                                                         |
|                          |     | <i>Cross-sectional study</i> —Report numbers of outcome events or summary measures                                                                                                                           |
| Main results             | 16  | (a) Give unadjusted estimates and, if applicable, confounder-adjusted estimates and their precision (eg, 95% confidence interval). Make clear which confounders were adjusted for and why they were included |
|                          | ✓   |                                                                                                                                                                                                              |
|                          | ✓   | (b) Report category boundaries when continuous variables were categorized                                                                                                                                    |
|                          | NA  | (c) If relevant, consider translating estimates of relative risk into absolute risk for a meaningful time period                                                                                             |
| Other analyses           | 17  | Report other analyses done—eg analyses of subgroups and interactions, and sensitivity analyses                                                                                                               |
|                          | ✓   |                                                                                                                                                                                                              |
| <b>Discussion</b>        |     |                                                                                                                                                                                                              |
| Key results              | 18  | Summarise key results with reference to study objectives                                                                                                                                                     |
|                          | ✓   |                                                                                                                                                                                                              |
| Limitations              | 19  | Discuss limitations of the study, taking into account sources of potential bias or imprecision. Discuss both direction and magnitude of any potential bias                                                   |
|                          | ✓   |                                                                                                                                                                                                              |
| Interpretation           | 20  | Give a cautious overall interpretation of results considering objectives, limitations, multiplicity of analyses, results from similar studies, and other relevant evidence                                   |
|                          | ✓   |                                                                                                                                                                                                              |
| Generalisability         | 21  | Discuss the generalisability (external validity) of the study results                                                                                                                                        |
|                          | ✓   |                                                                                                                                                                                                              |
| <b>Other information</b> |     |                                                                                                                                                                                                              |
| Funding                  | 22  | Give the source of funding and the role of the funders for the present study and, if applicable, for the original study on which the present article is based                                                |
|                          | ✓   |                                                                                                                                                                                                              |

\*Give information separately for cases and controls in case-control studies and, if applicable, for exposed and unexposed groups in cohort and cross-sectional studies.

**Note:** An Explanation and Elaboration article discusses each checklist item and gives methodological background and published examples of transparent reporting. The STROBE checklist is best used in conjunction with this article (freely available on the Web sites of PLoS Medicine at <http://www.plosmedicine.org/>, Annals of Internal Medicine at <http://www.annals.org/>, and Epidemiology at <http://www.epidem.com/>). Information on the STROBE Initiative is available at [www.strobe-statement.org](http://www.strobe-statement.org).



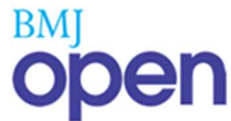

**Risk factors for livestock-associated MRSA persistent carriage and environmental exposure in veal calf farmers and their family members: an observational longitudinal study.**

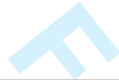

|                                 |                                                                                                                                                                                                                                                                                                                                                                                                                                                                                                                                                                                                                                                                                                                                                                                                                                                                                                                                                                                                                                                                                                                                                                                                                                                           |
|---------------------------------|-----------------------------------------------------------------------------------------------------------------------------------------------------------------------------------------------------------------------------------------------------------------------------------------------------------------------------------------------------------------------------------------------------------------------------------------------------------------------------------------------------------------------------------------------------------------------------------------------------------------------------------------------------------------------------------------------------------------------------------------------------------------------------------------------------------------------------------------------------------------------------------------------------------------------------------------------------------------------------------------------------------------------------------------------------------------------------------------------------------------------------------------------------------------------------------------------------------------------------------------------------------|
| Journal:                        | <i>BMJ Open</i>                                                                                                                                                                                                                                                                                                                                                                                                                                                                                                                                                                                                                                                                                                                                                                                                                                                                                                                                                                                                                                                                                                                                                                                                                                           |
| Manuscript ID:                  | bmjopen-2013-003272.R1                                                                                                                                                                                                                                                                                                                                                                                                                                                                                                                                                                                                                                                                                                                                                                                                                                                                                                                                                                                                                                                                                                                                                                                                                                    |
| Article Type:                   | Research                                                                                                                                                                                                                                                                                                                                                                                                                                                                                                                                                                                                                                                                                                                                                                                                                                                                                                                                                                                                                                                                                                                                                                                                                                                  |
| Date Submitted by the Author:   | 12-Jul-2013                                                                                                                                                                                                                                                                                                                                                                                                                                                                                                                                                                                                                                                                                                                                                                                                                                                                                                                                                                                                                                                                                                                                                                                                                                               |
| Complete List of Authors:       | Dorado-Garcia, Alejandro; Division of Environmental Epidemiology, Institute for Risk Assessment Sciences, Utrecht University, Bos, Marian; Division of Environmental Epidemiology, Institute for Risk Assessment Sciences, Utrecht University, Graveland, Haitske; National Centre for Infectious Disease Control Netherlands, RIVM National Institute for Public Health and The Environment, van Cleef, Brigitte; National Centre for Infectious Disease Control Netherlands, RIVM National Institute for Public Health and The Environment, ; Laboratory for Medical Microbiology and Immunology, St. Elisabeth Hospital, Verstappen, Koen; Department of Infectious Diseases and Immunology, Faculty of Veterinary Medicine, Utrecht University, kluymans, jan; Laboratory for Medical Microbiology and Immunology, St. Elisabeth Hospital, Wagenaar, Jaap; Animal Sciences Group, Central Veterinary Institute of Wageningen UR, ; Department of Infectious Diseases and Immunology, Faculty of Veterinary Medicine, Utrecht University, Heederik, Dick; Division of Environmental Epidemiology, Institute for Risk Assessment Sciences, Utrecht University, ; Julius Center for Health Sciences and Primary Care, University Medical Center Utrecht, |
| <b>Primary Subject Heading</b>: | Public health                                                                                                                                                                                                                                                                                                                                                                                                                                                                                                                                                                                                                                                                                                                                                                                                                                                                                                                                                                                                                                                                                                                                                                                                                                             |
| Secondary Subject Heading:      | Epidemiology                                                                                                                                                                                                                                                                                                                                                                                                                                                                                                                                                                                                                                                                                                                                                                                                                                                                                                                                                                                                                                                                                                                                                                                                                                              |
| Keywords:                       | EPIDEMIOLOGY, Microbiology < BASIC SCIENCES, Public health < INFECTIOUS DISEASES, Epidemiology < INFECTIOUS DISEASES                                                                                                                                                                                                                                                                                                                                                                                                                                                                                                                                                                                                                                                                                                                                                                                                                                                                                                                                                                                                                                                                                                                                      |
|                                 |                                                                                                                                                                                                                                                                                                                                                                                                                                                                                                                                                                                                                                                                                                                                                                                                                                                                                                                                                                                                                                                                                                                                                                                                                                                           |

SCHOLARONE™  
Manuscripts

**Title:**

Risk factors for livestock-associated MRSA persistent carriage and environmental exposure in veal calf farmers and their family members: an observational longitudinal study.

**Short Title:** LA-MRSA persistent carriage and environmental exposure in pig farming.

**Authors:**

Alejandro Dorado-García<sup>1</sup>, Marian EH Bos<sup>1</sup>, Haitske Graveland<sup>2</sup>, Brigitte AGL van Cleef<sup>2,3</sup>, Koen M Verstappen<sup>4</sup>, Jan AJW Kluytmans<sup>3</sup>, Jaap A Wagenaar<sup>4,5</sup>, Dick JJ Heederik<sup>1,6</sup>.

**Affiliations:**

1. Institute for Risk Assessment Sciences, Division of Environmental Epidemiology, Utrecht University, Utrecht, The Netherlands.

2. Centre for Infectious Disease Control Netherlands, RIVM National Institute for Public Health and The Environment, Bilthoven, The Netherlands.

3. Laboratory for Medical Microbiology and Immunology, St. Elisabeth Hospital, Tilburg, The Netherlands.

4. Department of Infectious Diseases and Immunology, Faculty of Veterinary Medicine, Utrecht University, Utrecht, The Netherlands.

5. Animal Sciences Group, Central Veterinary Institute of Wageningen UR, Lelystad, The Netherlands.

6. Julius Center for Health Sciences and Primary Care, University Medical Center Utrecht, Utrecht, The Netherlands.

**Correspondence to:**

Dorado-García A., Institute for Risk Assessment Sciences, Utrecht University, PO Box 80178, 3508 TD Utrecht, The Netherlands. T: +31-30-253 8950. F: +31-30-253 9499. Email: a.doradogarcia@uu.nl.

**Key words (max 5):** Livestock-Associated MRSA, persistent carriage, longitudinal study, veal calves, environmental contamination

**Word count excluding title page, abstract, references, figures and tables:** 4.168

## 48 ABSTRACT

49  
50 **Objectives:** LA-MRSA emergence is a major public health concern. This study is aimed at  
51 assessing risk factors for persistently carrying MRSA in veal calf farmers and their family  
52 members. We also evaluate the dynamics of MRSA environmental load during the veal-calf  
53 production cycle.

54 **Design:** Observational, longitudinal, repeated cross-sectional study.

55 **Setting:** 52 veal calf farms in the Netherlands.

56 **Participants:** Between the end of 2010 to the end of 2011, a total of 211 farmers, family  
57 members and employees were included in the study.

58 **Primary outcome and secondary outcome measures:** Nasal swabs were taken from  
59 participants on days 0, 4, 7 and week 12. A persistent MRSA carrier was defined as a person  
60 positive for MRSA on days 0, 4 and 7. Participants filled in an extensive questionnaire to  
61 identify potential risk factors and confounders. For estimation of MRSA prevalence in calves  
62 and environmental contamination, animal nasal swabs and Electrostatic Dust Collectors  
63 (EDCs) were taken on day 0 and week 12.

64 **Results:** The presence of potential animal reservoirs (free-ranging farm cats and sheep) and  
65 the level of contact with veal calves was positively associated with persistent MRSA carriage.  
66 Interestingly, at the end of the study (week 12), there was a two-fold rise in animal  
67 prevalence and a significantly higher MRSA environmental load in the stables was found on  
68 farms with MRSA carriers.

69 **Conclusions:** This study supports the hypothesis that environmental contamination with  
70 MRSA plays a role in the acquisition of MRSA in farmers and their household members and  
71 suggests that other animal species should also be targeted to implement effective control  
72 strategies.

## 74 ARTICLE SUMMARY

### 75 Article focus:

- 76 • Determinants for persistent LA-MRSA carriage in humans and for a possible true  
77 colonization have not been thoroughly assessed.
- 78 • It is unclear whether bacterial contamination in the farm environment plays a role in  
79 LA-MRSA transmission in humans

### 80 Key messages:

- 81 • The presence of other animals in the farm might be of importance in acquisition and  
82 persistence LA-MRSA in humans. There is a need for detailed molecular-  
83 epidemiological analysis of MRSA specimens in various animal species and humans  
84 in the veal-calf farming community.

- 1  
2  
3  
4 85 • During the veal-calf production cycle, there is a parallel increase in animal prevalence  
5 86 and environmental MRSA load which is linked to higher risk for human carriage.  
6

7 87 **Strengths and limitations of this study:**

8  
9 88 The longitudinal nature of the data allows to establish dynamic epidemiological inferences.

10  
11 89 No other animals apart from veal-calves were sampled in this study. The self-sampling of  
12 90 noses by individuals might influence the sensitivity for MRSA detection.  
13

14 91

15 92

16 93 **INTRODUCTION**

17 94

18 95 In recent years, livestock-associated methicillin-resistant *Staphylococcus aureus* (LA-  
19 96 MRSA), specifically sequence type (ST) 398, has emerged in food-producing animals and  
20 97 people in contact with these animals.(1-4) Illness associated to ST398 in humans is rare and  
21 98 only a small proportion of MRSA infections can be attributed to LA-MRSA.(5,6)  
22 99 Nonetheless, invasive infections and hospital outbreaks of MRSA ST398 have been reported  
23 100 in Europe, the United States and Asia.(5,7,8)  
24  
25

26 101 LA-MRSA strains have been found mainly in pigs and veal calves, but they have the  
27 102 capacity to colonize a wide spectrum of hosts, including sheep and poultry.(9) Farmers are  
28 103 easily contaminated and in general the carriage prevalence in farmers is high. Frequency of  
29 104 transmission between farmers and their family members and among hospitalized humans  
30 105 appears to be low.(2,10,11) However, this belief might be contradicted by recently described  
31 106 LA-MRSA transmission events in Dutch patients with neither risk factors nor livestock  
32 107 contact.(12) The potential public health threat posed by these strains is emphasized in a  
33 108 recent metapopulation model in which the likelihood of persistent carriage in the livestock-  
34 109 exposed population was the key parameter for LA-MRSA spreading to the community.(13)  
35  
36

37 110 Previous studies have been mainly based on cross-sectional designs and have shown that  
38 111 intensity of animal contact and MRSA prevalence among animals are positively associated to  
39 112 LA-MRSA human carriage.(14) Associations between animal carriage and farm hygiene and  
40 113 antimicrobial use have also been shown.(15,16) A longitudinal study including periods of  
41 114 high and low exposure to animals showed that LA-MRSA carriage was mainly transient. It  
42 115 was suggested that LA-MRSA is a poor persistent colonizer in humans, which was confirmed  
43 116 by a study on short term occupational exposure.(10,14) However, risk factors for persistent  
44 117 LA-MRSA carriage and for a possible true colonization have not been thoroughly assessed.  
45 118 Furthermore, little is still known about the dynamics of environmental contamination with  
46 119 MRSA in the farm and its role in transmission to humans. A recent study showed a steep  
47 120 increase in prevalence among calves and in MRSA air load during the production cycle.(17)  
48  
49

50 121 The aim of the current study is twofold. Firstly, to assess risk factors and dose-response  
51 122 relationships for persistently carrying MRSA over a period of one week at the beginning of  
52 123 the production cycle in veal calf farmers and their family members. Secondly, to evaluate the  
53 124 deposition of MRSA-containing dust inside the farm and its relationship with animal and  
54 125 human MRSA carriage.  
55  
56

56 126

57 127

58

59

60

1  
2  
3 128 **MATERIALS AND METHODS**

4 129

5 130 **Study design and population**

6  
7  
8 131 A longitudinal cohort study was performed over a period of 12 weeks in 52 veal calf  
9 132 farms starting at the beginning of the production cycle. All farms were visited from the end of  
10 133 2010 to the end of 2011. All farms met the following inclusion criteria: implemented all-in-  
11 134 all-out system; no other livestock in large scale apart from veal calves; an unique location for  
12 135 all the stables or farm; veal calf farmers not working in another animal sector (e.g. transport  
13 136 of pigs) and not operating in other farms. Preference for selection was given to farms in the  
14 137 proximity of Utrecht, the Netherlands. On each farm there were 2 sampling moments for  
15 138 animal and environmental samples (day 0 and week 12) and 4 sampling moments for human  
16 139 samples (days 0, 4, 7 and week 12). Nasal swabs from both anterior nares of calves were  
17 140 taken and analysed in 10 pools of 6 swabs each (60 animals per farm). Swabs were also  
18 141 collected from farmers, family members and employees (n=211). On day 0, quantitative nasal  
19 142 and throat swabs were taken by field workers in the majority of participants or by self-  
20 143 sampling. On days 4, 7 and on week 12, dry cotton swabs (Copan, Brescia, Italy) were used  
21 144 to self-sample the nose. Swabs were given to participants with instructions including  
22 145 photographs in case of self-sampling. Nasal swabs in animals and humans were introduced in  
23 146 the nostril and rotated once. Throat swabs in humans sampled the area of the inner cheek  
24 147 including the tonsils. The swabs were immediately taken to the laboratory or sent by post and  
25 148 processed within 24 hours after arrival. Furthermore, environmental samples were taken by  
26 149 placing 4 Electrostatic Dust Collectors (EDCs) (Zeeman, Utrecht, The Netherlands) on  
27 150 different surfaces inside the stables and one on the highest cupboard in the living room or  
28 151 kitchen of the house. The EDCs were left in place during a period of 2 weeks and sent by post  
29 152 to the laboratory. Upon arrival, EDC samples were stored at -20°C until quantitative  
30 153 analysis.<sup>(18)</sup>

31  
32  
33  
34 154 All participants completed an informed consent and filled in an extensive questionnaire  
35 155 including items related to individual health status, household and farm characteristics,  
36 156 activities performed on the farm and hygiene practices. The protocol of the study was  
37 157 approved by Medical Ethical Committee of Utrecht University. The collection of animal  
38 158 samples was in compliance with the Dutch Law on Animal Health and Welfare.

39  
40  
41 159 For the assessment of MRSA persistent carriage, we selected the beginning of the veal  
42 160 calf production cycle, just after the stables were empty and when animal prevalence is lower.  
43 161 In this period, deposition of MRSA-containing dust particles in human nasal cavities and  
44 162 mechanical carriage was assumed to be less likely. Therefore and for the purpose of this  
45 163 study, a person was defined to be a persistent MRSA carrier when each of the nasal swabs  
46 164 collected on days 0, 4 and 7 were positive for MRSA presence.

47  
48  
49 165 **Laboratory analysis**

50  
51 166 Swabs in liquid transport medium (ESwab, Copan, Brescia, Italy) were used for  
52 167 quantitative cultivation. Serial dilutions (1:10) of the transport medium (concentration 10<sup>0</sup>)  
53 168 were made by adding 100 µl sample to 900 µl phosphate buffered saline (PBS) to a final  
54 169 concentration of 10<sup>-4</sup> of the original sample. Each dilution was cultured on chromID *S. aureus*  
55 170 and chromID MRSA agar plates (BioMérieux, La Balme Les Grottes, France) at 37°C for 18-  
56 171 24 hours. Plates with 10-100 colony-forming units (CFU) were used to calculate the original  
57 172 amount of CFU per swab. In order to detect positive samples without bacterial growth in the

1  
2  
3  
4 173 first day, the remaining transport medium and swab were enriched overnight in Mueller  
5 174 Hinton broth with 6.5% NaCl (MH+), and consequently cultured on chromID *S. aureus* and  
6 175 chromID MRSA agar plates. The theoretical lower limit of quantification (LLOQ) of MRSA  
7 176 CFU was 10. Dry cotton swabs (Copan) were inoculated directly onto chromID *S. aureus*,  
8 177 chromID MRSA and MH+. Confirmation of MRSA presence in the 3 sampling moments was  
9 178 done by Real-Time (RT) PCR targeting *mecA*, *femA* and *nuc* genes.(19,20) Methicillin-  
10 179 susceptible *Staphylococcus aureus* (MSSA) presence was tested when the bacterial growth on  
11 180 chromID *S. aureus* was higher than on chromID MRSA. For this purpose, 10 colonies were  
12 181 screened for methicillin susceptibility by using the cefoxitin disk diffusion method.  
13 182 Confirmation of MSSA was done by Real-Time PCR. Nasal swabs from calves were  
14 183 analysed in pools following standard procedures previously described.(21)

15  
16  
17 184 To obtain an estimate of exposure in CFU per EDC, EDCs were analysed by Real-Time  
18 185 quantitative PCR (qPCR). EDC samples were suspended in 10 mL EDTA saline buffer (150  
19 186 mM NaCl, 1 mM EDTA) and mixed in a Stomacher (Seward Ltd., London, United Kindom)  
20 187 for 10 minutes. Two mL of the resulting suspension was stored at -20°C for the analysis. For  
21 188 DNA isolation, 200 µL of the suspension was incubated at 95°C for 15 minutes. Phosphate  
22 189 buffered saline (PBS) was added and a Versant kPCR molecular system (Siemens Healthcare  
23 190 Diagnostics, The Hague, The Netherlands) was used for DNA purification with an elution  
24 191 volume of 50 µL. Five µL of the purified sample were used for detection of *mecA*, *femA* and  
25 192 *nuc* genes by the means of a LightCycler 480-II system (Roche Diagnostics, Almere, The  
26 193 Netherlands). For MRSA quantification, a standard curve was established for all targets. A  
27 194 standard control sample was included in each run to correct the curve for run-to-run variation.  
28 195 For interpretation of the results, CFU counts per PCR were transformed to CFU counts per  
29 196 EDC (1 CFU/PCR = 200 CFU/EDC). The theoretical limit of detection (LOD) was 20  
30 197 CFU/EDC.

31 198  
32 199 RT-PCR targeted at C01 gene was done for confirmation of ST398 in all MRSA positive  
33 200 human, animal and environmental samples.

34 201

### 35 202 **Data analysis**

36 203

37 204 Statistical analysis was performed using SAS software version 9.2 (SAS institute Inc.,  
38 205 Cary, North Carolina, USA). Descriptive analysis determined the cross-sectional human  
39 206 prevalences on each of the 4 sampling moments and the longitudinal carriage patterns  
40 207 (persistent, intermittent or non-carriers).

41 208 Risk factors for nasal MRSA persistent carriage were investigated with univariate and  
42 209 multivariate analysis. PROC GENMOD was used for Generalized Estimating Equations  
43 210 (GEE) modelling to take clustering of data at farm level into account. The mean response was  
44 211 modelled with a Poisson regression with robust standard errors. Crude and age-sex adjusted  
45 212 prevalence ratios were obtained. Eligibility criteria for variables to be considered in  
46 213 multivariable analysis included univariate p-values below 0.2, less than 10% of missing data  
47 214 in relation with the outcome, and at least 2 persistent carriers falling in each of the categories  
48 215 of the explanatory categorical variables. Bivariate correlation structure of all eligible  
49 216 variables was studied with PROC CORR and Spearman correlation coefficients were  
50 217 obtained. Thereafter, eligible variables were added in a stepwise backward selection approach  
51 218 and retained in the final model when  $P < 0.15$ . A  $p$ -value  $< 0.05$  was considered statistically  
52 219 significant.

1  
2  
3  
4 220 The shape of the relationships between MRSA persistent carriage and numerical  
5 221 variables was studied by means of nonparametric or semiparametric regression modelling  
6 222 (smoothing) using PROC GAM to relax the assumption of linearity. For this purpose, the  
7 223 number of CFU from quantitative nasal swabs positive for MRSA but below LLOQ was set  
8 224 to 5.  
9 225

10 226 To assess the environmental exposure during the first week, farms were classified in 3  
11 227 categories: i) farm with persistent carrier, when there was at least one MRSA persistent  
12 228 carrier working and/or living on the farm; ii) farm with intermittent carrier, when there was at  
13 229 least one MRSA intermittent carrier and there was no persistent carrier on the farm; iii) non-  
14 230 carrier farm, when all people at the farm were MRSA-negative on the first 3 sampling  
15 231 moments. On week 12 farms were classified as carrier and non-carrier farms when there was  
16 232 at least one MRSA carrier on the farm, and when all people on the farm were MRSA-  
17 233 negative on week 12 respectively. Proportions of MRSA-positive EDCs were calculated per  
18 234 farm category and sampling moment. For calculation of average exposure levels, CFU counts  
19 235 per EDC were log-transformed since they followed a highly right-tailed distribution. PROC  
20 236 LIFEREG was used for left-censored regression (tobit) modelling to obtain an accurate  
21 237 estimate of the mean exposure level accounting for the large proportion of undetectable  
22 238 values. Thereafter geometric means (GM) were calculated.  
23 239

## 24 240 **RESULTS**

### 25 241 **Descriptive results**

26 242 Nasal swabs were collected from 211 participants on 52 farms. The average nasal MRSA  
27 243 prevalence for the 4 sampling moments was twice as high in farmers (29.7%) as compared to  
28 244 family members (13.0%). Cross-sectional nasal MRSA prevalences per sampling moment are  
29 245 displayed in Supplemental Figure1.

30 246 Nasal carriage patterns for MRSA, MSSA and *S. aureus* in general (including both  
31 247 MSSA and MRSA) were assessed over the one week period. The MRSA and MSSA  
32 248 persistent carrier prevalence followed opposite directions in farmers as compared to family  
33 249 members. For MRSA persistent carriage the prevalence in farmers (15.5%) was twice as high  
34 250 as in family members (7.6%). MSSA persistent carriage prevalence was three times higher in  
35 251 family members than in farmers (15.3% and 5.2%, respectively). Regarding *S. aureus*, there  
36 252 were not significant differences between the subpopulations of farmers and family members  
37 253 and 22.8% of all individuals were persistently carrying the bacteria, 29.6% were intermittent  
38 254 carriers and the remaining 47.6% never carried *S. aureus*. Supplemental Table 1 shows these  
39 255 longitudinal carriage patterns in more detail.

40 256 The RT-PCR targeted at C01 gene showed that ST398 was present in 90.5% of the  
41 257 human MRSA isolates, in 97.9% of the MRSA positive animal pools and 90.9% of the  
42 258 MRSA positive EDCs.

### 43 259 **Microbiological status and persistent MRSA nasal carriage**

44 260 CFU counts were determined in 42 participants from quantitative nasal swabs on day 0.  
45 261 Figure 1 shows the shape of the relationship between the probability of being a persistent  
46 262 MRSA nasal carrier and the log-transformed MRSA concentration (CFU/swab suspension).  
47 263 The median CFU count was 43.65 with an interquartile range (IQR) 5.01-1,096.48. In  
48  
49  
50  
51  
52  
53  
54  
55  
56  
57  
58  
59  
60

264 addition, the univariate logistic regression analysis in this population resulted in 1.68 times  
265 higher risk (95% Confidence Interval (CI)=1.34-2.10,  $P<0.001$ ) for persistent MRSA carriage  
266 per 10 CFU increase.

267 No MSSA was found in MRSA-positive samples at day 0. In order to obtain an  
268 estimation of the prevalence ratio (PR) for the outcome when MSSA is present at day 0, data  
269 was manipulated by placing a MSSA positive result for one of the persistent carriers. This  
270 way an adjusted PR of 0.14 (95% CI=0.02-1.06,  $P=0.06$ ) was obtained.

271 People found positive for MRSA in throat swabs at day 0 were at higher risk for being  
272 persistent nasal carriers (adjusted PR=12.2, 95%CI=5.2-28.8,  $P<0.0001$ ). The spearman  
273 correlation coefficient between this variable and the outcome was 0.6 ( $P<0.0001$ ).

274 Sensitivity analysis was done restricted to ST398 and it yielded similar results as  
275 described above.

### 276 **Univariate and multivariate analysis for persistent MRSA nasal carriage**

277 Crude and age-sex-adjusted PRs in determinants meeting the specified criteria are  
278 presented in Table 1. Sex and smoking habits were not clearly associated with the outcome  
279 ( $P>0.2$ ). Because these variables together with age are considered potential confounders,  
280 sensitivity analysis was performed with smoking habits added to sex and age for adjustment.  
281 This did not result in significant changes in estimates (results not shown) when compared to  
282 adjustment without smoking habits.

283 Statistically significant risk factors for persistent MRSA carriage were identified (table  
284 2). Pet ownership showed a PR of 2.7 ( $P=0.05$ ). The number of working hours per week in  
285 the farm was positively associated with the outcome (adjusted PR=2.5 expressed per 20  
286 hours/week increase,  $P=0.001$ ). An increasing probability for MRSA persistent carriage with  
287 number of hours working in the farm was also demonstrated through semiparametric  
288 regression modelling (Supplemental Figure2). Administration of antimicrobials to calves  
289 through milk and injection in the past month preceding sampling was also a significant risk  
290 factor (adjusted PR= 3.4,  $P=0.01$ ). Other associations with the outcome did not show  
291 statistical significance. These include protective factors such as people living on farms with a  
292 changing room available (adjusted PR=0.5,  $P=0.07$ ) or on farms where clean towels are used  
293 after work (adjusted PR=0.6,  $P=0.11$ ) and risk factors, such as people living in farms where  
294 baby boxes are cleaned at the beginning of the production cycle (adjusted PR=1.3,  $P=0.54$ ).  
295 Other determinants such as the prevalence of MRSA in animals at the farm level did not  
296 show an association with persistent human MRSA carriage (PR=1.0, 95%CI=1.0-1.0,  
297  $P=0.96$ ). There was also no association found with variables regarding individual health  
298 status.

299 Results from the multiple logistic regression analysis are presented in Table 2. In model  
300 A, all variables meeting the described criteria were eligible to entry. In this model, number of  
301 working hours per week showed the most significant association with persistent MRSA  
302 carriage (PR=1.8 expressed per 20 hours/week increase,  $P<0.0001$ ). Because this variable  
303 was a very strong determinant, as a result of which potential tasks were not retained, a model  
304 was explored (model B) without the number of working hours. In consequence, stable  
305 management (sorting calves) was retained in the final model B with a statistically significant  
306 PR of 3.1 ( $P=0.03$ ). In both multivariate models, the presence of cats on the farm was



307 significantly associated with the outcome (PR=2.8, P=0.01 in model A and PR=2.6, P=0.04  
308 in model B).

309 Specific tasks on the farm were adjusted for number of working hours in a bivariate  
310 analysis and the estimates obtained were not statistically significant. Only stable management  
311 remained positively associated with the outcome with a PR of 2.5 (95%CI=0.7-9.6; P=0.17);  
312 however, administration of antibiotics in the month before sampling showed no association  
313 with a PR of 1.1 (95%CI=0.2-5.9; P=0.91).

314 Sensitivity analysis was done restricted to ST398 and it yielded similar univariate and  
315 multivariate results.

316 Table 1. Crude and adjusted for sex and age prevalence ratios (PR) for nasal MRSA  
317 persistent carriage in 195 veal calf farmers and household members from 51 farms.

| Determinant                                     | Category              | N   | No. Persistent carriers <sup>a</sup><br>(prevalence %) | Mean<br>(range) | PR  | 95% CI                | PR <sup>b</sup><br>Adj | 95% CI               |
|-------------------------------------------------|-----------------------|-----|--------------------------------------------------------|-----------------|-----|-----------------------|------------------------|----------------------|
| General characteristics:                        |                       |     |                                                        |                 |     |                       |                        |                      |
| Sex                                             | Male                  | 103 | 9 (8.7)                                                | -               | 1   | -                     | -                      | -                    |
|                                                 | Female                | 92  | 11 (12.0)                                              | -               | 1.4 | 0.6-3.2               | -                      | -                    |
| Age                                             | -                     | 195 | -                                                      | 30 (0.1-81)     | 1.0 | 1.0-1.0**             | -                      | -                    |
|                                                 | per 10 years increase | 195 | -                                                      | -               | 1.3 | 1.1-1.6**             | -                      | -                    |
| Farm and household characteristics:             |                       |     |                                                        |                 |     |                       |                        |                      |
| Presence of sheep in farm                       | No                    | 149 | 12 (8.1)                                               | -               | 1   | -                     | 1                      | -                    |
|                                                 | Yes                   | 46  | 8 (17.4)                                               | -               | 2.2 | 1.1-4.5*              | 2.4                    | 1.2-4.8*             |
| Presence of cats on farm                        | No                    | 96  | 5 (5.2)                                                | -               | 1   | -                     | 1                      | -                    |
|                                                 | Yes                   | 99  | 15 (15.2)                                              | -               | 3.0 | 1.2-7.1*              | 2.7                    | 1.1-6.6*             |
| Presence of pets                                | No                    | 74  | 4 (5.4)                                                | -               | 1   | -                     | 1                      | -                    |
|                                                 | Yes                   | 121 | 16 (13.2)                                              | -               | 2.7 | 1.0-7.4*              | 2.6                    | 1.0-6.7 <sup>†</sup> |
| Tasks performed last 7 days <sup>c</sup> :      |                       |     |                                                        |                 |     |                       |                        |                      |
| Sorting calves (stable management)              | No                    | 113 | 5 (4.4)                                                | -               | 1   | -                     | 1                      | -                    |
|                                                 | Yes                   | 82  | 15 (18.3)                                              | -               | 4.2 | 1.5-12.3**            | 4.7                    | 1.3-16.8*            |
| Healthcare / control <sup>d</sup>               | No                    | 132 | 9 (6.8)                                                | -               | 1   | -                     | 1                      | -                    |
|                                                 | Yes                   | 63  | 11 (17.5)                                              | -               | 2.6 | 1.1-6.1*              | 2.3                    | 0.8-7.3              |
| Feeding calves                                  | No                    | 72  | 2 (2.8)                                                | -               | 1   | -                     | 1                      | -                    |
|                                                 | Yes                   | 123 | 18 (14.6)                                              | -               | 7.2 | 0.9-58.6 <sup>†</sup> | 5.4                    | 0.6-52.3             |
| Work at farm, hygiene cleaning and disinfection |                       |     |                                                        |                 |     |                       |                        |                      |
| Administration of antibiotics during            | No                    | 131 | 8 (6.1)                                                | -               | 1   | -                     | 1                      | -                    |

|                          |     |     |           |        |     |            |     |                      |
|--------------------------|-----|-----|-----------|--------|-----|------------|-----|----------------------|
| last month               | Yes | 64  | 12 (18.8) | -      | 3.2 | 1.4-7.1**  | 3.4 | 1.3-9.1*             |
| # working hours per week | -   | 195 | -         | 16.5   | 1.0 | 1.0-1.0*** | 1.0 | 1.0-1.1**            |
| per 20 hours increase    | -   | -   | -         | (0-80) | 1.8 | 1.4-2.4*** | 2.5 | 1.4-4.2**            |
| Clean towel              | No  | 45  | 7 (16.7)  | -      | 1   | -          | 1   | -                    |
|                          | Yes | 150 | 13 (8.67) | -      | 0.6 | 0.3-1.3    | 0.6 | 0.3-1.1              |
| Changing room available  | No  | 18  | 3 (16.7)  | -      | 1   | -          | 1   | -                    |
|                          | Yes | 177 | 17 (9.7)  | -      | 0.6 | 0.3-1.2    | 0.5 | 0.2-1.0 <sup>t</sup> |
| Cleaning of baby boxes   | No  | 184 | 18 (9.8)  | -      | 1   | -          | 1   | -                    |
|                          | Yes | 11  | 2 (18.2)  | -      | 1.9 | 1.0-3.5*   | 1.3 | 0.6-2.8              |

318 <sup>a</sup> A person is considered a persistent carrier when all nasal swabs at days 0, 4 and 7 are positive for  
 319 MRSA.

320 <sup>b</sup> Prevalence ratios adjusted for sex and age.

321 <sup>c</sup> Tasks performed in the week before time 0.

322 <sup>d</sup> The task healthcare and control includes the administration of antibiotics.

323 <sup>t</sup> Nonsignificant trend (P-value 0.05-0.10). \* P-value 0.01-0.05. \*\* P-value 0.0001-0.01. \*\*\* P-value  
 324 <0.0001.

325

326 Table 2. Results from multiple logistic regression analysis for nasal MRSA persistent  
 327 carriage in veal calf farmers and their household members (N=195). Model A: final model in  
 328 which all variables meeting eligibility criteria were added to the automatic selection. Model  
 329 B: final model in which all the variables in model A were added to the automatic selection  
 330 except # working hours.

| Determinant               | Category              | PR   | 95% CI    | P-value   |
|---------------------------|-----------------------|------|-----------|-----------|
| MODEL A                   |                       |      |           |           |
| # working hours per week  | -                     | 1.03 | 1.02-1.04 | 0.000*    |
| per 20 hours increase     | -                     | 1.81 | 1.49-2.19 | -         |
| Presence of cats on farm  | No                    | 1    | -         | -         |
|                           | Yes                   | 2.80 | 1.23-6.36 | 0.014*    |
| Presence of sheep in farm | No                    | 1    | -         | -         |
|                           | Yes                   | 1.83 | 0.89-3.77 | 0.100     |
| Changing room available   | No                    | 1    | -         | -         |
|                           | Yes                   | 0.48 | 0.20-1.13 | 0.094     |
| Cleaning of baby boxes    | No                    | 1    | -         | -         |
|                           | Yes                   | 3.96 | 1.59-9.90 | 0.003*    |
| MODEL B                   |                       |      |           |           |
| Age                       | -                     | 1.02 | 1.00-1.05 | 0.037*    |
|                           | per 10 years increase | -    | 1.26      | 1.01-1.56 |
| Presence of cats on farm  | No                    | 1    | -         | -         |
|                           | Yes                   | 2.57 | 1.05-6.33 | 0.040*    |
| Presence of sheep in farm | No                    | 1    | -         | -         |
|                           | Yes                   | 1.78 | 0.88-3.59 | 0.107     |

|                |     |      |           |        |
|----------------|-----|------|-----------|--------|
| Sorting calves | No  | 1    | -         | -      |
|                | Yes | 3.10 | 1.14-8.47 | 0.027* |

331 \* P-value statistically significant (i.e. < 0.05).

### 332 Contamination of the environment with MRSA

333 At the beginning of the production cycle, MRSA was detected in only 4.6% of all EDCs  
334 placed in stables and on 6 farms. Differences in environmental exposure across persistent,  
335 intermittent and non-carrier farms were not significant (Table 3). None of the EDCs placed  
336 inside the houses were found to be positive for MRSA.

337 In week 12, MRSA was detected in 50.6% of all EDCs placed in the stables and on 39  
338 farms. There was a significantly higher proportion of EDCs positive for MRSA and a trend  
339 for higher CFU counts per EDC in farms where MRSA carriers were found in week 12  
340 (Table 4). Stratified analysis was performed in farmers and family members. The same trends  
341 for higher MRSA environmental load were found only in farmers, however not statistically  
342 significant (results not shown). MRSA was found in EDCs from 10 houses (Table 4).

343 The mean pooled MRSA prevalence in calves rose from 18.7% at day 0 to 46% in week  
344 12. A simple linear regression between the EDC MRSA levels (maximum log-transformed  
345 MRSA CFU/EDC per farm) and animal prevalence showed a positive and significant  
346 association ( $\beta=0.006$ ,  $P=0.0014$ ). Furthermore, there was a 60% increased probability for  
347 detecting a MRSA-positive EDC in farms where animal prevalence in week 12 was above the  
348 mean ( $PR=1.6$ ,  $95\%CI=1.09-2.38$ ,  $P=0.02$ ). With regards to human carriage in relation to  
349 animal prevalence, no association between being a MRSA carrier and the prevalence in  
350 calves was found on day 0. On week 12 there was a slight increase in prevalence among  
351 farmers as compared to the previous sampling moment (see supplemental figure 1) and  
352 individuals from farms with MRSA prevalence in calves above the mean were at 2 times  
353 higher risk for carrying MRSA ( $PR=2.12$ ,  $95\%CI=1.12-4.01$ ,  $P=0.02$ ).

354

355 Table 3. Environmental MRSA samples (EDCs) taken in stables at the beginning of the  
356 production cycle in 51 farms with persistent, intermittent or non-MRSA carrying veal calf  
357 farmers and household members.

|                                                         | Persistent <sup>a</sup> | Intermittent <sup>a</sup> | Non-carrier <sup>a</sup> | P-value <sup>b</sup> |
|---------------------------------------------------------|-------------------------|---------------------------|--------------------------|----------------------|
| No. farms with MRSA positive EDCs / total no. farms (%) | 2/18 (11.11)            | 2/12 (16.67)              | 2/21 (9.52)              | 0.86                 |
| No. MRSA positive EDCs / total no. EDCs (%)             | 2/69 (2.90)             | 4/47 (8.51)               | 3/78 (3.85)              | 0.38                 |
| GM MRSA CFU/EDC (p-value) <sup>c</sup>                  | <1 (0.75)               | <1 (0.29)                 | <1 (ref.)                | -                    |

358 <sup>a</sup> A farm was categorised as persistent when there was at least one persistent carrier living and/or  
 359 working on the farm, non-carrier farms had no individual positive for MRSA in nasal swabs on days  
 360 0,4,7 and intermittent farms were the remaining.  
 361 <sup>b</sup> P-values among proportions were calculated with Fisher's exact test. Mean values had not an overall  
 362 assigned p-value since they could not be tested with non-parametric tests.  
 363 <sup>c</sup> Geometric mean (antilogged results from tobit regression). P-values indicate the difference with the  
 364 reference category (non-carrier farm).  
 365

366 Table 4. Environmental MRSA samples (EDCs) taken in stables on week 12 in 49 farms with  
 367 MRSA carriers and non-carriers.

|                                                            | Location<br>EDC    | Carrier farms <sup>a</sup> | Non-carrier farms <sup>a</sup> | P-value <sup>b</sup> |
|------------------------------------------------------------|--------------------|----------------------------|--------------------------------|----------------------|
| No. farms with MRSA positive<br>EDCs / total no. farms (%) | Stable             | 22/25 (88.00)              | 17/24 (70.83)                  | 0.14                 |
|                                                            | House              | 3/25 (12.00)               | 7/24 (29.17)                   | 0.17                 |
| No. MRSA positive EDCs /<br>total no. EDCs (%)             | Stable             | 54/90 (60.00)              | 35/86 (40.70)                  | 0.01                 |
|                                                            | House <sup>d</sup> | -                          | -                              | -                    |
| GM <sup>c</sup> MRSA CFU/EDC                               | Stable             | 27.54                      | 16.98                          | 0.06                 |
|                                                            | House              | 2.29                       | 5.50                           | 0.29                 |

368 <sup>a</sup> A farm was categorised as carrier when there was at least one carrier on week 12 living and/or  
 369 working on the farm, non-carrier farms were the remaining.

370 <sup>b</sup> P-values among proportions were calculated with Chi-square test and Fisher's exact test when 20%  
 371 of the expected cell values were <5. P-values for the GM indicate the difference with the reference  
 372 category (non-carrier farms).

373 <sup>c</sup> Geometric mean (antilogged results from tobit regression).<sup>d</sup> There was one EDC per house, thus the  
 374 values in this line are the same as the ones in "No. farms with MRSA positive EDCs / total no. farms  
 375 (%)".  
 376

## 377 DISCUSSION

378 The associations found during the first week after arrival of the animals on the farm show  
 379 that the level of exposure to veal calves and the presence of potential animal reservoirs (pets,  
 380 free-ranging farm cats and sheep) are risk factors for persistent MRSA carriage in farmers  
 381 and household members. Additionally, persistent MRSA carriers seem to have a different  
 382 microbiological profile when compared to intermittent and non-carriers, which is  
 383 characterised by higher MRSA CFU counts, presence of MRSA in throat and absence of  
 384 MSSA. This study shows that as the production cycle advances, there is a rise in MRSA  
 385 prevalence in calves that leads to higher contamination of the air and higher probability for  
 386 human MRSA carriage.

387 Descriptive results confirm that high MRSA carriage prevalence (17.6%) is observed  
 388 among individuals living on farms, as seen in other studies.(2,16) This percentage represents  
 389 a carriage burden in countries where estimated MRSA prevalence in community is below 1%  
 390 such as the Netherlands and Scandinavian countries. The large difference in prevalence  
 391 between farmers and family members can be attributed to the different intensity of animal

1  
2  
3  
4 392 contact and is again an indication of a low LA-MRSA human-to-human transmission.(16,22)  
5 393 Swabs in liquid transport medium were used only on day 0 for the purpose of quantification.  
6 394 The fact that higher prevalences are observed on day 0 as compared to days 4 and 7 might be  
7 395 due to highest sensitivity for MRSA detection as compared to dry cotton swabs  
8 396 (supplemental figure 1). The carriage patterns of *S. aureus* presented are similar to those  
9 397 described by Wertheim and co-authors,(23) in which they found percentages of 20%, 30%  
10 398 and 50% for persistent, intermittent and non-carriers respectively among healthy individuals.  
11 399 The lower MRSA persistent carrier prevalence in the total study population (9.7%) as  
12 400 compared to the average cross-sectional MRSA prevalence (17.6%) indicates that carriage of  
13 401 LA-MRSA is fleeting and varies within individuals.

14  
15  
16 402 Confirmation of only ST398 was done in the laboratory and it was predominant (higher  
17 403 than 90%) among the MRSA isolates from humans, animal pools and EDC samples. MRSA  
18 404 positive subjects negative for ST398 did not visit a hospital during the previous 12 months of  
19 405 the study and there was other than ST398 MRSA present in animal and environmental  
20 406 samples. All MRSA was considered to be circulating and transmitted in the farm since it is  
21 407 very likely that other livestock-associated sequence types were present as in previous studies  
22 408 (14, 16).

23  
24  
25 409 Due to culturing techniques, MSSA was detected with difficulty when there was a  
26 410 predominant MRSA growth. The possible underestimation of MSSA asks for a cautious  
27 411 interpretation of the results. Nevertheless it is remarkable that no persistent MRSA carrier  
28 412 was positive for MSSA at day 0. This suggests that the presence of MSSA in the nose might  
29 413 be a protective factor for MRSA persistent carriage. Moreover, a negative association  
30 414 between MSSA and MRSA has been recently found in a study.(14)

31  
32 415 In the first week of the production cycle the MRSA environmental load was lower and it  
33 416 can be assumed that nasal contamination with MRSA-containing dust particles and transient  
34 417 mechanical carriage was less likely to occur as compared to further time points in the  
35 418 production cycle. As shown in figure 2, there is an increased probability for persistent MRSA  
36 419 carriage associated with higher MRSA CFU counts in nasal swabs. Moreover, isolation of  
37 420 MRSA in throat swabs at day 0 was significantly associated to the outcome (PR=12.2). These  
38 421 findings suggest that there might be a true colonization in persistent MRSA carriers as  
39 422 defined here. Furthermore a recent study has shown that ST398 is capable of adequately  
40 423 competing for a niche with a human strain and survives in the human nose for longer  
41 424 periods.(24)

42  
43  
44 425 Direct association between administration of antibiotics and MRSA persistent carriage in  
45 426 farmers and their family members, as defined in our study, was shown in univariate results  
46 427 (PR=3.2). It is known that when antimicrobials are administered to animals, substantial  
47 428 quantities of these drugs can be present in manure, on surfaces of animal houses and in dust  
48 429 as a potential risk source.(25) We could hypothesize that aspiration of dust containing  
49 430 antibiotics, either from a contaminated environment or directly from a powder formulation,  
50 431 would exert a selective pressure in the anterior nares leading to higher risk for MRSA  
51 432 persistent carriage in people occupationally exposed. However, this association was not  
52 433 confirmed in multivariate models and it needs further exploration. Number of working hours  
53 434 and other tasks were correlated and may have more influence on persistent carriage. This was  
54 435 also shown when adjustment for number of working hours was done in a bivariate fashion.

1  
2  
3  
4 436 This study supports that close contact with animals is a major risk factor for persistent  
5 437 LA-MRSA carriage in humans. This is made clear by the final set of variables retained in the  
6 438 multivariate models. The number of working hours was most strongly associated with  
7 439 persistent carriage as indicated by the model A and by the smoothed exposure-response  
8 440 relation shown in the Supplemental Figure 3. Moreover, when the number of working hours  
9 441 was removed for model B, another variable representing close contact with animals (stable  
10 442 management) was retained by the backward procedure.

11  
12 443 In recent years, several reports have suggested a potential role for pet animals,  
13 444 specifically cats and dogs, in household MRSA transmission and relapse of human MRSA  
14 445 infections. This transmission seems to be of anthrozoönotic origin. Thus, pets can acquire  
15 446 human strains from humans and they can cause colonization or infection in human  
16 447 cohabitants.(26-31) In most cases, the distribution of the clones in pet animals has mirrored  
17 448 the epidemiology of human clones and mainly shared hospital-associated (HA) and  
18 449 community-associated (CA) MRSA strains have been reported. It is remarkable that in this  
19 450 study, having a pet in the household was strongly associated with MRSA carriage in veal  
20 451 farmers and household members. Moreover, there is a demonstrated spread of LA-MRSA  
21 452 between animal species, humans and the farm environment.(32) In this study no other  
22 453 animals apart from veal calves were sampled, however the presence of free-ranging farm cats  
23 454 and sheep were significantly associated and retained in multivariate models. A previous large  
24 455 cross-sectional study sampled 35 cats from 25 farms, 26 of them came frequently in the veal  
25 456 stables. Only one of these cats was found to be MRSA positive with a spa type t011  
26 457 (ST398).(33) Cats might act as reservoirs but this is more suggestive of cats acting as  
27 458 mechanical vectors. These animals might represent an intermittent source of LA-MRSA that  
28 459 might contribute to LA-MRSA persistent carriage in humans.

29  
30  
31  
32 460 Other farm characteristics and hygiene practices were also associated with persistent  
33 461 MRSA carriage, although not significantly. Having a changing room in the farm and using a  
34 462 clean towel after working in the stables were found as protective factors. This might give a  
35 463 direction to specific preventive strategies. On the other hand, cleaning of baby boxes at the  
36 464 beginning of the production cycle was a risk factor for the outcome (PR=4 in multivariate  
37 465 model A and PR=1.9 in univariate analysis). This hygiene practise could give rise to  
38 466 transitory spread in the air of accumulated MRSA.

39  
40  
41 467 Environmental contamination with dust particles containing MRSA is much lower in veal  
42 468 calf farming as compared to pig farming and associations are less evident.(34) As shown in  
43 469 table 3, no difference in the environmental MRSA load was found across persistent,  
44 470 intermittent and non-carrier farms at the beginning of the production cycle. However, the  
45 471 two-fold rise in animal prevalence at the end of the study was associated with a considerably  
46 472 higher environmental MRSA load and a significantly higher proportion of MRSA-positive  
47 473 EDCs was found on farms with MRSA carriers on week 12. This finding supports that  
48 474 contamination of the environment plays a role in the acquisition of MRSA in people living or  
49 475 working in the farm.

50  
51  
52 476 A possible limitation of the study is the self-sampling of nose and throat by individuals  
53 477 which might be lacking of accuracy for MRSA detection. This is however believed to be a  
54 478 minor bias. A recent pilot study has shown high degree of agreement between self-samples  
55 479 and investigator samples (93% agreement, kappa 0.85 for nasal swabs and 83% agreement,  
56 480 kappa 0.60 for throat swabs).(35) Another limitation is the previously described  
57 481 underestimation of MSSA presence but this is of negligible impact in the results because

1  
2  
3  
4 482 detection of MRSA and *S. aureus* remains unaffected. Finally, there were many missing  
5 483 values in some variables and they were excluded from the analysis. There were 5 individuals  
6 484 (/211=2%) with missing nasal samples but sensitivity analysis did not reveal significant  
7 485 changes in estimates.

8  
9 486 In conclusion, people living and/or working in veal calf farms who persistently carry  
10 487 MRSA seem to be defined by a differential microbiological profile. The associations found  
11 488 here with the presence of free-ranging farm cats and multispecies farming ask for improved  
12 489 internal and external biosecurity measures. Detailed molecular-epidemiological analysis of  
13 490 MRSA specimens on the farm in various animal species and humans is also essential to  
14 491 identify reservoirs and transmission routes for LA-MRSA. Finally, environmental  
15 492 contamination with MRSA has to be thoroughly studied to assess the extent of its importance  
16 493 in the transmission of MRSA within the veal-calf farming community.

#### 18 494 19 495 **ACKNOWLEDGEMENTS**

20 496  
21 497 The authors wish to thank all farmers for their participation and all field workers and  
22 498 laboratory assistants, especially Isabella Oosting-Van Schothorst, Arjen Timmerman and  
23 499 Marian Broekhuizen-Stins.

#### 24 500 25 501 **CONTRIBUTORSHIP STATEMENT**

26 502 Alejandro Dorado-García performed the statistical analyses and interpretation of the  
27 503 data, and drafted the manuscript. Marian EH Bos collected the data, contributed to the  
28 504 interpretation of the data, and contributed to the critical revision of the manuscript. Haitske  
29 505 Graveland participated in the conception and design of the study, collected the data and  
30 506 contributed to the critical revision of the manuscript. Brigitte AGL van Cleef and Jan AJW  
31 507 Kluytmans contributed to the critical revision of the manuscript. Koen M Verstappen carried  
32 508 out the laboratory analysis. Jaap A Wagenaar conceived the study and contributed to the  
33 509 critical revision of the manuscript. Dick JJ Heederik conceived the study and contributed to  
34 510 the interpretation of the data and the critical revision of the manuscript. All authors read and  
35 511 approved the final manuscript.

#### 36 512 37 513 **DATA SHARING**

38 514 Data will not be publicly accessible.  
39 515 Interested individuals may contact the authors.

#### 40 516 41 517 **FUNDING**

42 518  
43 519 The POM project was funded by The Netherlands Organization for Health Research and  
44 520 Development (ZonMw) (grant number 125020009), the Product Boards for Livestock Meat  
45 521 and Eggs and the Dutch Ministry of Agriculture Nature and Food Quality.

#### 46 522 47 523 **COMPETING INTERESTS**

48 524  
49 525 None declared

#### 50 526 51 527 **REFERENCES**

52 528 (1) Fitzgerald JR. Livestock-associated *Staphylococcus aureus*: origin, evolution and public health  
53 529 threat. *Trends Microbiol* 2012;20:192-8.

- 1  
2  
3 530 (2) Graveland H, Duim B, van Duijkeren E, et al. Livestock-associated methicillin-resistant  
4 531 *Staphylococcus aureus* in animals and humans. *Int J Med Microbiol* 2011;301:630-4.  
5  
6  
7 532 (3) van Duijkeren E, Box AT, Heck ME, et al. Methicillin-resistant staphylococci isolated from  
8 533 animals. *Vet Microbiol* 2004;103:91-7.  
9  
10 534 (4) Tiemersma EW, Bronzwaer SL, Lyytikainen O, et al. Methicillin-resistant *Staphylococcus aureus*  
11 535 in Europe, 1999-2002. *Emerg Infect Dis* 2004;10:1627-34.  
12  
13 536 (5) van Cleef BA, Monnet DL, Voss A, et al. Livestock-associated methicillin-resistant  
14 537 *Staphylococcus aureus* in humans, Europe. *Emerg Infect Dis* 2011;17:502-5.  
15  
16 538 (6) van den Broek IV, van Cleef BA, Haenen A, et al. Methicillin-resistant *Staphylococcus aureus* in  
17 539 people living and working in pig farms. *Epidemiol Infect* 2009;137:700-8.  
18  
19 540 (7) van der Mee-Marquet N, Francois P, Domelier-Valentin AS, et al. Emergence of unusual  
20 541 bloodstream infections associated with pig-borne-like *Staphylococcus aureus* ST398 in France. *Clin*  
21 542 *Infect Dis* 2011;52:152-3.  
22  
23 543 (8) Rasigade JP, Laurent F, Hubert P, et al. Lethal necrotizing pneumonia caused by an ST398  
24 544 *Staphylococcus aureus* strain. *Emerg Infect Dis* 2010;16:1330.  
25  
26 545 (9) Catry B, Van Duijkeren E, Pomba MC, et al. Reflection paper on MRSA in food-producing and  
27 546 companion animals: epidemiology and control options for human and animal health. *Epidemiol Infect*  
28 547 2010;138:626-44.  
29  
30 548 (10) van Cleef BA, Graveland H, Haenen AP, et al. Persistence of livestock-associated methicillin-  
31 549 resistant *Staphylococcus aureus* in field workers after short-term occupational exposure to pigs and  
32 550 veal calves. *J Clin Microbiol* 2011;49:1030-3.  
33  
34 551 (11) Bootsma MC, Wassenberg MW, Trapman P, et al. The nosocomial transmission rate of animal-  
35 552 associated ST398 methicillin-resistant *Staphylococcus aureus*. *J R Soc Interface* 2011;8:578-84.  
36  
37 553 (12) Lekkerkerk WS, van de Sande-Bruinsma N, van der Sande MA, et al. Emergence of MRSA of  
38 554 unknown origin in the Netherlands. *Clin Microbiol Infect* 2012;18:656-61.  
39  
40 555 (13) Porphyre T, Giotis ES, Lloyd DH, et al. A metapopulation model to assess the capacity of spread  
41 556 of methicillin-resistant *Staphylococcus aureus* ST398 in humans. *PLoS One* 2012;7:e47504.  
42  
43 557 (14) Graveland H, Wagenaar JA, Bergs K, et al. Persistence of livestock associated MRSA CC398 in  
44 558 humans is dependent on intensity of animal contact. *PLoS One* 2011;6:e16830.  
45  
46 559 (15) Bos ME, Graveland H, Portengen L, et al. Livestock-associated MRSA prevalence in veal calf  
47 560 production is associated with farm hygiene, use of antimicrobials, and age of the calves. *Prev Vet*  
48 561 *Med* 2012;105:155-9.  
49  
50 562 (16) Graveland H, Wagenaar JA, Heesterbeek H, et al. Methicillin resistant *Staphylococcus aureus*  
51 563 ST398 in veal calf farming: human MRSA carriage related with animal antimicrobial usage and farm  
52 564 hygiene. *PLoS One* 2010;5:e10990.  
53  
54 565 (17) Graveland H, Wagenaar JA, Verstappen KM, et al. Dynamics of MRSA carriage in veal calves:  
55 566 A longitudinal field study. *Prev Vet Med* 2012;107:180-6.  
56  
57  
58  
59  
60



- 1  
2  
3 567 (18) Noss I, Wouters IM, Visser M, et al. Evaluation of a low-cost electrostatic dust fall collector for  
4 568 indoor air endotoxin exposure assessment. *Appl Environ Microbiol* 2008;74:5621-7.
- 5  
6  
7 569 (19) Kilic A, Muldrew K, Tang Y, et al. Triplex real-time polymerase chain reaction assay for  
8 570 simultaneous detection of *Staphylococcus aureus* and coagulase-negative staphylococci and  
9 571 determination of methicillin resistance directly from positive blood culture bottles. *Diagn Microbiol*  
10 572 *Infect Dis* 2010;66:349-55.
- 11  
12 573 (20) Francois P, Pittet D, Bento M, et al. Rapid detection of methicillin-resistant *Staphylococcus*  
13 574 *aureus* directly from sterile or nonsterile clinical samples by a new molecular assay. *J Clin Microbiol*  
14 575 2003;41:254-60.
- 15  
16 576 (21) Graveland H, van Duijkeren E, van Nes A, et al. Evaluation of isolation procedures and  
17 577 chromogenic agar media for the detection of MRSA in nasal swabs from pigs and veal calves. *Vet*  
18 578 *Microbiol* 2009;139:121-5.
- 19  
20 579 (22) Wassenberg MW, Hopmans TE, Troelstra A, et al. Methicillin-resistant *Staphylococcus aureus*  
21 580 of livestock origin in Dutch hospitals: high-risk patients need only to be investigated if admitted to  
22 581 hospital. *Ned Tijdschr Geneesk* 2008;152:2681-8.
- 23  
24 582 (23) Wertheim HF, Melles DC, Vos MC, et al. The role of nasal carriage in *Staphylococcus aureus*  
25 583 infections. *The Lancet Infectious Diseases* 2005;5:751-62.
- 26  
27  
28 584 (24) Slingerland BC, Tavakol M, McCarthy AJ, et al. Survival of *Staphylococcus aureus* ST398 in the  
29 585 Human Nose after Artificial Inoculation. *PLoS One* 2012;7:e48896.
- 30  
31 586 (25) Hamscher G, Pawelzick HT, Sczesny S, et al. Antibiotics in dust originating from a pig-fattening  
32 587 farm: a new source of health hazard for farmers? *Environ Health Perspect* 2003;111:1590-4.
- 33  
34 588 (26) Bender JB, Waters KC, Nerby J, et al. Methicillin-resistant *Staphylococcus aureus* (MRSA)  
35 589 isolated from pets living in households with MRSA-infected children. *Clin Infect Dis* 2012;54:449-  
36 590 50.
- 37  
38 591 (27) Haenni M, Saras E, Chatre P, et al. A USA300 variant and other human-related methicillin-  
39 592 resistant *Staphylococcus aureus* strains infecting cats and dogs in France. *J Antimicrob Chemother*  
40 593 2012;67:326-9.
- 41  
42 594 (28) Bramble M, Morris D, Tolomeo P, et al. Potential role of pet animals in household transmission  
43 595 of methicillin-resistant *Staphylococcus aureus*: a narrative review. *Vector Borne Zoonotic Dis*  
44 596 2011;11:617-20.
- 45  
46 597 (29) Coughlan K, Olsen KE, Boxrud D, et al. Methicillin-resistant *Staphylococcus aureus* in Resident  
47 598 Animals of a Long-term Care Facility. *Zoonoses and Public Health* 2010;57:220-6.
- 48  
49 599 (30) Sing A, Tuschak C, Hörmansdorfer S. Methicillin-Resistant *Staphylococcus aureus* in a Family  
50 600 and Its Pet Cat. *N Engl J Med* 2008;358:1200-1.
- 51  
52  
53 601 (31) Cefai C, Ashurst S, Owens C. Human carriage of methicillin-resistant *Staphylococcus aureus*  
54 602 linked with pet dog. *Lancet* 1994;344:539-40.
- 55  
56 603 (32) Pletinckx LJ, Verheghe M, Crombe F, et al. Evidence of possible methicillin-resistant  
57 604 *Staphylococcus aureus* ST398 spread between pigs and other animals and people residing on the same  
58 605 farm. *Prev Vet Med* 2012;109:293-303

- 1  
2  
3  
4 606 (33) Wagenaar JA, Giessen AW. Veegerelateerde MRSA: epidemiologie in dierlijke productieketens,  
5 607 transmissie naar de mens en karakterisatie van de kloon. RIVM-rapport 330224001, 2009. (in Dutch)  
6  
7 608 (34) van Cleef BA, van Benthem B, Verkade E, et al. Dynamics of MRSA carriage in pig farmers: a  
8 609 prospective cohort study. Submitted 2013.  
9  
10 610 (35) van Cleef BA, van Rijen M, Ferket M, et al. Self-sampling is appropriate for detection of  
11 611 Staphylococcus aureus: a validation study. Antimicrob Resist Infect Control 2012;1:34.  
12  
13 612  
14  
15  
16  
17  
18  
19  
20  
21  
22  
23  
24  
25  
26  
27  
28  
29  
30  
31  
32  
33  
34  
35  
36  
37  
38  
39  
40  
41  
42  
43  
44  
45  
46  
47  
48  
49  
50  
51  
52  
53  
54  
55  
56  
57  
58  
59  
60

For peer review only

**Title:**

Risk factors for livestock-associated MRSA persistent carriage and environmental exposure in veal calf farmers and their family members: an observational longitudinal study.

**Short Title:** LA-MRSA persistent carriage and environmental exposure in pig farming.

**Authors:**

Alejandro Dorado-García<sup>1</sup>, Marian EH Bos<sup>1</sup>, Haitske Graveland<sup>2</sup>, Brigitte AGL van Cleef<sup>2,3</sup>, Koen M Verstappen<sup>4</sup>, Jan AJW Kluytmans<sup>3</sup>, Jaap A Wagenaar<sup>4,5</sup>, Dick JJ Heederik<sup>1,6</sup>.

**Affiliations:**

1. Institute for Risk Assessment Sciences, Division of Environmental Epidemiology, Utrecht University, Utrecht, The Netherlands.

2. Centre for Infectious Disease Control Netherlands, RIVM National Institute for Public Health and The Environment, Bilthoven, The Netherlands.

3. Laboratory for Medical Microbiology and Immunology, St. Elisabeth Hospital, Tilburg, The Netherlands.

4. Department of Infectious Diseases and Immunology, Faculty of Veterinary Medicine, Utrecht University, Utrecht, The Netherlands.

5. Animal Sciences Group, Central Veterinary Institute of Wageningen UR, Lelystad, The Netherlands.

6. Julius Center for Health Sciences and Primary Care, University Medical Center Utrecht, Utrecht, The Netherlands.

**Correspondence to:**

Dorado-García A., Institute for Risk Assessment Sciences, Utrecht University, PO Box 80178, 3508 TD Utrecht, The Netherlands. T: +31-30-253 8950. F: +31-30-253 9499. Email: a.doradogarcia@uu.nl.

**Key words (max 5):** Livestock-Associated MRSA, persistent carriage, longitudinal study, veal calves, environmental contamination

**Word count excluding title page, abstract, references, figures and tables:** 4.168

Formatted: Numbering: Continuous

## ABSTRACT

**Objectives:** LA-MRSA emergence is a major public health concern. This study is aimed at assessing risk factors for persistently carrying MRSA in veal calf farmers and their family members. We also evaluate the dynamics of MRSA environmental load during the veal-calf production cycle.

**Design:** Observational, longitudinal, repeated cross-sectional study.

**Setting:** 52 veal calf farms in the Netherlands.

**Participants:** Between the end of 2010 to the end of 2011, a total of 211 farmers, family members and employees were included in the study.

**Primary outcome and secondary outcome measures:** Nasal swabs were taken from participants on days 0, 4, 7 and week 12. A persistent MRSA carrier was defined as a person positive for MRSA on days 0, 4 and 7. Participants filled in an extensive questionnaire to identify potential risk factors and confounders. For estimation of MRSA prevalence in calves and environmental contamination, animal nasal swabs and Electrostatic Dust Collectors (EDCs) were taken on day 0 and week 12.

**Results:** The presence of potential animal reservoirs (free-ranging farm cats and sheep) and the level of contact with veal calves was positively associated with persistent MRSA carriage. Interestingly, at the end of the study (week 12), there was a two-fold rise in animal prevalence and a significantly higher MRSA environmental load in the stables was found on farms with MRSA carriers.

**Conclusions:** This study supports the hypothesis that environmental contamination with MRSA plays a role in the acquisition of MRSA in farmers and their household members and suggests that other animal species should also be targeted to implement effective control strategies.

## ARTICLE SUMMARY

### Article focus:

- Determinants for persistent LA-MRSA carriage in humans and for a possible true colonization have not been thoroughly assessed.
- It is unclear whether bacterial contamination in the farm environment plays a role in LA-MRSA transmission in humans

### Key messages:

- The presence of other animals in the farm might be of importance in acquisition and persistence LA-MRSA in humans. There is a need for detailed molecular-epidemiological analysis of MRSA specimens in various animal species and humans in the veal-calf farming community.

- 1  
2  
3  
4  
5  
6  
7 85 • During the veal-calf production cycle, there is a parallel increase in animal prevalence  
8 86 and environmental MRSA load which is linked to higher risk for human carriage.

9  
10 87 **Strengths and limitations of this study:**

11 88 The longitudinal nature of the data allows to establish dynamic epidemiological inferences.

12 89 No other animals apart from veal-calves were sampled in this study. The self-sampling of  
13 90 noses by individuals might influence the sensitivity for MRSA detection.

14 91

15 92

16 93 **INTRODUCTION**

17 94  
18 95 In recent years, livestock-associated methicillin-resistant *Staphylococcus aureus* (LA-  
19 96 MRSA), specifically sequence type (ST) 398, has emerged in food-producing animals and  
20 97 people in contact with these animals.(1-4) Illness associated to ST398 in humans is rare and  
21 98 only a small proportion of MRSA infections can be attributed to LA-MRSA.(5,6)  
22 99 Nonetheless, invasive infections and hospital outbreaks of MRSA ST398 have been reported  
23 100 in Europe, the United States and Asia.(5,7,8)

24 101 LA-MRSA strains have been found mainly in pigs and veal calves, but they have the  
25 102 capacity to colonize a wide spectrum of hosts, including sheep and poultry.(9) Farmers are  
26 103 easily contaminated and in general the carriage prevalence in farmers is high. Frequency of  
27 104 transmission between farmers and their family members and among hospitalized humans  
28 105 appears to be low.(2,10,11) However, this belief might be contradicted by recently described  
29 106 LA-MRSA transmission events in Dutch patients with neither risk factors nor livestock  
30 107 contact.(12) The potential public health threat posed by these strains is emphasized in a  
31 108 recent metapopulation model in which the likelihood of persistent carriage in the livestock-  
32 109 exposed population was the key parameter for LA-MRSA spreading to the community.(13)

33 110 Previous studies have been mainly based on cross-sectional designs and have shown that  
34 111 intensity of animal contact and MRSA prevalence among animals are positively associated to  
35 112 LA-MRSA human carriage.(14) Associations between animal carriage and farm hygiene and  
36 113 antimicrobial use have also been shown.(15,16) A longitudinal study including periods of  
37 114 high and low exposure to animals showed that LA-MRSA carriage was mainly transient. It  
38 115 was suggested that LA-MRSA is a poor persistent colonizer in humans, which was confirmed  
39 116 by a study on short term occupational exposure.(10,14) However, risk factors for persistent  
40 117 LA-MRSA carriage and for a possible true colonization have not been thoroughly assessed.  
41 118 Furthermore, little is still known about the dynamics of environmental contamination with  
42 119 MRSA in the farm and its role in transmission to humans. A recent study showed a steep  
43 120 increase in prevalence among calves and in MRSA air load during the production cycle.(17)

44 121 The aim of the current study is twofold. Firstly, to assess risk factors and dose-response  
45 122 relationships for persistently carrying MRSA over a period of one week at the beginning of  
46 123 the production cycle in veal calf farmers and their family members. Secondly, to evaluate the  
47 124 deposition of MRSA-containing dust inside the farm and its relationship with animal and  
48 125 human MRSA carriage.

49 126

50 127

51

52

53

54

55

56

57

58

59

60

## MATERIALS AND METHODS

### Study design and population

A longitudinal cohort study was performed over a period of 12 weeks in 52 veal calf farms starting at the beginning of the production cycle. All farms were visited from the end of 2010 to the end of 2011. [All farms met the following inclusion criteria: implemented all-in-all-out system; no other livestock in large scale apart from veal calves; an unique location for all the stables or farm; veal calf farmers not working in another animal sector \(e.g. transport of pigs\) and not operating in other farms. Preference for selection was given to farms in the proximity of Utrecht, the Netherlands.](#) On each farm there were 2 sampling moments for animal and environmental samples (day 0 and week 12) and 4 sampling moments for human samples (days 0, 4, 7 and week 12). Nasal swabs from both anterior nares of calves were taken and analysed in 10 pools of 6 swabs each (60 animals per farm). Swabs were also collected from farmers, family members and employees (n=211). On day 0, quantitative nasal and throat swabs were taken by field workers in the majority of participants or by self-sampling. On days 4, 7 and on week 12, dry cotton swabs (Copan, Brescia, Italy) were used to self-sample the nose. Swabs were given to participants with instructions including photographs in case of self-sampling. Nasal swabs in animals and humans were introduced in the nostril and rotated once. Throat swabs in humans sampled the area of the inner cheek including the tonsils. The swabs were immediately taken to the laboratory or sent by post and processed within 24 hours after arrival. Furthermore, environmental samples were taken by placing 4 Electrostatic Dust Collectors (EDCs) (Zeeman, Utrecht, The Netherlands) on different surfaces inside the stables and one on the highest cupboard in the living room or kitchen of the house. The EDCs were left in place during a period of 2 weeks and sent by post to the laboratory. Upon arrival, EDC samples were stored at -20°C until quantitative analysis.<sup>(18)</sup> ~~A schematic overview of the study design is displayed in the Supplemental Figure 1.~~

Comment [DGA(1): This figure can be deleted

All participants completed an informed consent and filled in an extensive questionnaire including items related to individual health status, household and farm characteristics, activities performed on the farm and hygiene practices. The protocol of the study was approved by Medical Ethical Committee of Utrecht University. The collection of animal samples was in compliance with the Dutch Law on Animal Health and Welfare.

For the assessment of MRSA persistent carriage, we selected the beginning of the veal calf production cycle, just after the stables were empty and when animal prevalence is lower. In this period, deposition of MRSA-containing dust particles in human nasal cavities and mechanical carriage was assumed to be less likely. Therefore and for the purpose of this study, a person was defined to be a persistent MRSA carrier when each of the nasal swabs collected on days 0, 4 and 7 were positive for MRSA presence.

### Laboratory analysis

Swabs in liquid transport medium (ESwab, Copan, Brescia, Italy) were used for quantitative cultivation. Serial dilutions (1:10) of the transport medium (concentration  $10^0$ ) were made by adding 100  $\mu$ l sample to 900  $\mu$ l phosphate buffered saline (PBS) to a final concentration of  $10^{-4}$  of the original sample. Each dilution was cultured on chromID *S. aureus* and chromID MRSA agar plates (BioMérieux, La Balme Les Grottes, France) at 37°C for 18-24 hours. Plates with 10-100 colony-forming units (CFU) were used to calculate the original

1  
2  
3  
4  
5  
6  
7 173 amount of CFU per swab. In order to detect positive samples without bacterial growth in the  
8 174 first day, the remaining transport medium and swab were enriched overnight in Mueller  
9 175 Hinton broth with 6.5% NaCl (MH+), and consequently cultured on chromID *S. aureus* and  
10 176 chromID MRSA agar plates. The theoretical lower limit of quantification (LLOQ) of MRSA  
11 177 CFU was 10. Dry cotton swabs (Copan) were inoculated directly onto chromID *S. aureus*,  
12 178 chromID MRSA and MH+. Confirmation of MRSA presence in the 3 sampling moments was  
13 179 done by Real-Time (RT) PCR targeting *mecA*, *femA* and *nuc* genes.(19,20) Methicillin-  
14 180 susceptible *Staphylococcus aureus* (MSSA) presence was tested when the bacterial growth on  
15 181 chromID *S. aureus* was higher than on chromID MRSA. For this purpose, 10 colonies were  
16 182 screened for methicillin susceptibility by using the cefoxitin disk diffusion method.  
17 183 Confirmation of MSSA was done by Real-Time PCR. Nasal swabs from calves were  
18 184 analysed in pools following standard procedures previously described.(21)

19  
20 185 To obtain an estimate of exposure in CFU per EDC, EDCs were analysed by Real-Time  
21 186 quantitative PCR (qPCR). EDC samples were suspended in 10 mL EDTA saline buffer (150  
22 187 mM NaCl, 1 mM EDTA) and mixed in a Stomacher (Seward Ltd., London, United Kindom)  
23 188 for 10 minutes. Two mL of the resulting suspension was stored at -20°C for the analysis. For  
24 189 DNA isolation, 200 µL of the suspension was incubated at 95°C for 15 minutes. Phosphate  
25 190 buffered saline (PBS) was added and a Versant kPCR molecular system (Siemens Healthcare  
26 191 Diagnostics, The Hague, The Netherlands) was used for DNA purification with an elution  
27 192 volume of 50 µL. Five µL of the purified sample were used for detection of *mecA*, *femA* and  
28 193 *nuc* genes by the means of a LightCycler 480-II system (Roche Diagnostics, Almere, The  
29 194 Netherlands). For MRSA quantification, a standard curve was established for all targets. A  
30 195 standard control sample was included in each run to correct the curve for run-to-run variation.  
31 196 For interpretation of the results, CFU counts per PCR were transformed to CFU counts per  
32 197 EDC (1 CFU/PCR = 200 CFU/EDC). The theoretical limit of detection (LOD) was 20  
33 198 CFU/EDC.

34 200 [RT-PCR targeted at C01 gene was done for confirmation of ST398 in all MRSA positive](#)  
35 201 [human, animal and environmental samples.](#)

### 36 202

### 37 203 **Data analysis**

38 204

39 205 Statistical analysis was performed using SAS software version 9.2 (SAS institute Inc.,  
40 206 Cary, North Carolina, USA). Descriptive analysis determined the cross-sectional human  
41 207 prevalences on each of the 4 sampling moments and the longitudinal carriage patterns  
42 208 (persistent, intermittent or non-carriers).

43 209 Risk factors for nasal MRSA persistent carriage were investigated with univariate and  
44 210 multivariate analysis. PROC GENMOD was used for Generalized Estimating Equations  
45 211 (GEE) modelling to take clustering of data at farm level into account. The mean response was  
46 212 modelled with a Poisson regression with robust standard errors. Crude and age-sex adjusted  
47 213 prevalence ratios were obtained. Eligibility criteria for variables to be considered in  
48 214 multivariable analysis included univariate p-values below 0.2, less than 10% of missing data  
49 215 in relation with the outcome, and at least 2 persistent carriers falling in each of the categories  
50 216 of the explanatory categorical variables. Bivariate correlation structure of all eligible  
51 217 variables was studied with PROC CORR and Spearman correlation coefficients were  
52 218 obtained. Thereafter, eligible variables were added in a stepwise backward selection approach  
53 219 and retained in the final model when  $P < 0.15$ . A  $p\text{-value} < 0.05$  was considered statistically  
54 220 significant.

1  
2  
3  
4  
5  
6  
7 221 The shape of the relationships between MRSA persistent carriage and numerical  
8 222 variables was studied by means of nonparametric or semiparametric regression modelling  
9 223 (smoothing) using PROC GAM to relax the assumption of linearity. For this purpose, the  
10 224 number of CFU from quantitative nasal swabs positive for MRSA but below LLOQ was set  
11 225 to 5.  
12 226

13 227 To assess the environmental exposure during the first week, farms were classified in 3  
14 228 categories: i) farm with persistent carrier, when there was at least one MRSA persistent  
15 229 carrier working and/or living on the farm; ii) farm with intermittent carrier, when there was at  
16 230 least one MRSA intermittent carrier and there was no persistent carrier on the farm; iii) non-  
17 231 carrier farm, when all people at the farm were MRSA-negative on the first 3 sampling  
18 232 moments. On week 12 farms were classified as carrier and non-carrier farms when there was  
19 233 at least one MRSA carrier on the farm, and when all people on the farm were MRSA-  
20 234 negative on week 12 respectively. Proportions of MRSA-positive EDCs were calculated per  
21 235 farm category and sampling moment. For calculation of average exposure levels, CFU counts  
22 236 per EDC were log-transformed since they followed a highly right-tailed distribution. PROC  
23 237 LIFEREG was used for left-censored regression (tobit) modelling to obtain an accurate  
24 238 estimate of the mean exposure level accounting for the large proportion of undetectable  
25 239 values. Thereafter geometric means (GM) were calculated.  
26 240

## 27 241 RESULTS

### 28 242 Descriptive results

30 243 Nasal swabs were collected from 211 participants on 52 farms. The ~~total population~~  
31 244 average nasal MRSA prevalence for the 4 sampling moments was ~~17.6% and in farmers it~~  
32 245 ~~was~~ twice as high ~~in farmers~~ (29.7%) as ~~compared to in~~ family members (13.0%). Cross-  
33 246 sectional nasal MRSA prevalences per sampling moment are displayed in Supplemental  
34 247 Figure ~~12~~.

36 248 Nasal carriage patterns for MRSA, MSSA and *S. aureus* in general (including both  
37 249 MSSA and MRSA) were assessed over the one week period. The MRSA and MSSA  
38 250 persistent carrier prevalence followed opposite directions in farmers as compared to family  
39 251 members. For MRSA persistent carriage the prevalence in farmers (15.5%) was twice as high  
40 252 as in family members (7.6%). MSSA persistent carriage prevalence was three times higher in  
41 253 family members than in farmers (15.3% and 5.2%, respectively). Regarding *S. aureus*, there  
42 254 were not significant differences between the subpopulations of farmers and family members  
43 255 and 22.8% of all individuals were persistently carrying the bacteria, 29.6% were intermittent  
44 256 carriers and the remaining 47.6% never carried *S. aureus*. Supplemental Table 1 shows these  
45 257 longitudinal carriage patterns in more detail.

46 258 The RT-PCR targeted at C01 gene showed that ST398 was present in 90.5% of the  
47 259 human MRSA isolates, in 97.9% of the MRSA positive animal pools and 90.9% of the  
48 260 MRSA positive EDCs.

### 50 261 Microbiological status and persistent MRSA nasal carriage

51  
52 262 CFU counts were determined in 42 participants from quantitative nasal swabs on day 0.  
53 263 Figure 1 shows the shape of the relationship between the probability of being a persistent  
54 264 MRSA nasal carrier and the log-transformed MRSA concentration (CFU/swab suspension).  
55  
56  
57  
58  
59  
60

Comment [DGA(2)]: Previous supplemental figure 1 can be deleted



1  
2  
3  
4  
5  
6  
7 265 The median CFU count was 43.65 with an interquartile range (IQR) 5.01-1,096.48. In  
8 266 addition, the univariate logistic regression analysis in this population resulted in 1.68 times  
9 267 higher risk (95% Confidence Interval (CI)=1.34-2.10,  $P<0.001$ ) for persistent MRSA carriage  
10 268 per 10 CFU increase.

11  
12 269 No MSSA was found in MRSA-positive samples at day 0. In order to obtain an  
13 270 estimation of the prevalence ratio (PR) for the outcome when MSSA is present at day 0, data  
14 271 was manipulated by placing a MSSA positive result for one of the persistent carriers. This  
15 272 way an adjusted PR of 0.14 (95% CI=0.02-1.06,  $P=0.06$ ) was obtained.

16  
17 273 People found positive for MRSA in throat swabs at day 0 were at higher risk for being  
18 274 persistent nasal carriers (adjusted PR=12.2, 95%CI=5.2-28.8,  $P<0.0001$ ). The spearman  
19 275 correlation coefficient between this variable and the outcome was 0.6 ( $P<0.0001$ ).

20 276 [Sensitivity analysis was done restricted to ST398 and it yielded similar results as](#)  
21 277 [described above.](#)

### 22 23 278 **Univariate and multivariate analysis for persistent MRSA nasal carriage**

24  
25 279 Crude and age-sex-adjusted PRs in determinants meeting the specified criteria are  
26 280 presented in Table 1. Sex and smoking habits were not clearly associated with the outcome  
27 281 ( $P>0.2$ ). Because these variables together with age are considered potential confounders,  
28 282 sensitivity analysis was performed with smoking habits added to sex and age for adjustment.  
29 283 This did not result in significant changes in estimates (results not shown) when compared to  
30 284 adjustment without smoking habits.

31 285 Statistically significant risk factors for persistent MRSA carriage were identified (table  
32 286 2). Pet ownership showed a PR of 2.7 ( $P=0.05$ ). The number of working hours per week in  
33 287 the farm was positively associated with the outcome (adjusted PR=2.5 expressed per 20  
34 288 hours/week increase,  $P=0.001$ ). An increasing probability for MRSA persistent carriage with  
35 289 number of hours working in the farm was also demonstrated through semiparametric  
36 290 regression modelling (Supplemental Figure-23). Administration of antimicrobials to calves  
37 291 through milk and injection in the past month preceding sampling was also a significant risk  
38 292 factor (adjusted PR= 3.4,  $P=0.01$ ). Other associations with the outcome did not show  
39 293 statistical significance. These include protective factors such as people living on farms with a  
40 294 changing room available (adjusted PR=0.5,  $P=0.07$ ) or on farms where clean towels are used  
41 295 after work (adjusted PR=0.6,  $P=0.11$ ) and risk factors, such as people living in farms where  
42 296 baby boxes are cleaned at the beginning of the production cycle (adjusted PR=1.3,  $P=0.54$ ).  
43 297 Other determinants such as the prevalence of MRSA in animals at the farm level did not  
44 298 show an association with persistent human MRSA carriage (PR=1.0, 95%CI=1.0-1.0,  
45 299  $P=0.96$ ). There was also no association found with variables regarding individual health  
46 300 status.

47  
48 301 Results from the multiple logistic regression analysis are presented in Table 2. In model  
49 302 A, all variables meeting the described criteria were eligible to entry. In this model, number of  
50 303 working hours per week showed the most significant association with persistent MRSA  
51 304 carriage (PR=1.8 expressed per 20 hours/week increase,  $P<0.0001$ ). Because this variable  
52 305 was a very strong determinant, as a result of which potential tasks were not retained, a model  
53 306 was explored (model B) without the number of working hours. In consequence, stable  
54 307 management (sorting calves) was retained in the final model B with a statistically significant  
55 308 PR of 3.1 ( $P=0.03$ ). In both multivariate models, the presence of cats on the farm was

309 significantly associated with the outcome (PR=2.8, P=0.01 in model A and PR=2.6, P=0.04  
310 in model B).

311 Specific tasks on the farm were adjusted for number of working hours in a bivariate  
312 analysis and the estimates obtained were not statistically significant. Only stable management  
313 remained positively associated with the outcome with a PR of 2.5 (95%CI=0.7-9.6; P=0.17);  
314 however, administration of antibiotics in the month before sampling showed no association  
315 with a PR of 1.1 (95%CI=0.2-5.9; P=0.91).

316 [Sensitivity analysis was done restricted to ST398 and it yielded similar univariate and](#)  
317 [multivariate results.](#)

318 Table 1. Crude and adjusted for sex and age prevalence ratios (PR) for nasal MRSA  
319 persistent carriage in 195 veal calf farmers and household members from 51 farms.

| Determinant                                     | Category              | N   | No. Persistent carriers <sup>a</sup><br>(prevalence %) | Mean<br>(range) | PR  | 95% CI                | PR <sup>b</sup><br>Adj | 95% CI               |
|-------------------------------------------------|-----------------------|-----|--------------------------------------------------------|-----------------|-----|-----------------------|------------------------|----------------------|
| General characteristics:                        |                       |     |                                                        |                 |     |                       |                        |                      |
| Sex                                             | Male                  | 103 | 9 (8.7)                                                | -               | 1   | -                     | -                      | -                    |
|                                                 | Female                | 92  | 11 (12.0)                                              | -               | 1.4 | 0.6-3.2               | -                      | -                    |
| Age                                             | -                     | 195 | -                                                      | 30 (0.1-81)     | 1.0 | 1.0-1.0**             | -                      | -                    |
|                                                 | per 10 years increase | 195 | -                                                      | -               | 1.3 | 1.1-1.6**             | -                      | -                    |
| Farm and household characteristics:             |                       |     |                                                        |                 |     |                       |                        |                      |
| Presence of sheep in farm                       | No                    | 149 | 12 (8.1)                                               | -               | 1   | -                     | 1                      | -                    |
|                                                 | Yes                   | 46  | 8 (17.4)                                               | -               | 2.2 | 1.1-4.5*              | 2.4                    | 1.2-4.8*             |
| Presence of cats on farm                        | No                    | 96  | 5 (5.2)                                                | -               | 1   | -                     | 1                      | -                    |
|                                                 | Yes                   | 99  | 15 (15.2)                                              | -               | 3.0 | 1.2-7.1*              | 2.7                    | 1.1-6.6*             |
| Presence of pets                                | No                    | 74  | 4 (5.4)                                                | -               | 1   | -                     | 1                      | -                    |
|                                                 | Yes                   | 121 | 16 (13.2)                                              | -               | 2.7 | 1.0-7.4*              | 2.6                    | 1.0-6.7 <sup>†</sup> |
| Tasks performed last 7 days <sup>c</sup> :      |                       |     |                                                        |                 |     |                       |                        |                      |
| Sorting calves (stable management)              | No                    | 113 | 5 (4.4)                                                | -               | 1   | -                     | 1                      | -                    |
|                                                 | Yes                   | 82  | 15 (18.3)                                              | -               | 4.2 | 1.5-12.3**            | 4.7                    | 1.3-16.8*            |
| Healthcare / control <sup>d</sup>               | No                    | 132 | 9 (6.8)                                                | -               | 1   | -                     | 1                      | -                    |
|                                                 | Yes                   | 63  | 11 (17.5)                                              | -               | 2.6 | 1.1-6.1*              | 2.3                    | 0.8-7.3              |
| Feeding calves                                  | No                    | 72  | 2 (2.8)                                                | -               | 1   | -                     | 1                      | -                    |
|                                                 | Yes                   | 123 | 18 (14.6)                                              | -               | 7.2 | 0.9-58.6 <sup>†</sup> | 5.4                    | 0.6-52.3             |
| Work at farm, hygiene cleaning and disinfection |                       |     |                                                        |                 |     |                       |                        |                      |
| Administration of antibiotics during            | No                    | 131 | 8 (6.1)                                                | -               | 1   | -                     | 1                      | -                    |

|                          |     |     |           |        |     |            |     |                      |
|--------------------------|-----|-----|-----------|--------|-----|------------|-----|----------------------|
| last month               | Yes | 64  | 12 (18.8) | -      | 3.2 | 1.4-7.1**  | 3.4 | 1.3-9.1*             |
| # working hours per week | -   | 195 | -         | 16.5   | 1.0 | 1.0-1.0*** | 1.0 | 1.0-1.1**            |
| per 20 hours increase    | -   | -   | -         | (0-80) | 1.8 | 1.4-2.4*** | 2.5 | 1.4-4.2**            |
| Clean towel              | No  | 45  | 7 (16.7)  | -      | 1   | -          | 1   | -                    |
|                          | Yes | 150 | 13 (8.67) | -      | 0.6 | 0.3-1.3    | 0.6 | 0.3-1.1              |
| Changing room available  | No  | 18  | 3 (16.7)  | -      | 1   | -          | 1   | -                    |
|                          | Yes | 177 | 17 (9.7)  | -      | 0.6 | 0.3-1.2    | 0.5 | 0.2-1.0 <sup>†</sup> |
| Cleaning of baby boxes   | No  | 184 | 18 (9.8)  | -      | 1   | -          | 1   | -                    |
|                          | Yes | 11  | 2 (18.2)  | -      | 1.9 | 1.0-3.5*   | 1.3 | 0.6-2.8              |

<sup>a</sup> A person is considered a persistent carrier when all nasal swabs at days 0, 4 and 7 are positive for MRSA.

<sup>b</sup> Prevalence ratios adjusted for sex and age.

<sup>c</sup> Tasks performed in the week before time 0.

<sup>d</sup> The task healthcare and control includes the administration of antibiotics.

<sup>†</sup> Nonsignificant trend (P-value 0.05-0.10). \* P-value 0.01-0.05 \*\*P-value 0.0001-0.01. \*\*\*P-value <0.0001.

Table 2. Results from multiple logistic regression analysis for nasal MRSA persistent carriage in veal calf farmers and their household members (N=195). Model A: final model in which all variables meeting eligibility criteria were added to the automatic selection. Model B: final model in which all the variables in model A were added to the automatic selection except # working hours.

| Determinant               | Category              | PR   | 95% CI    | P-value   |
|---------------------------|-----------------------|------|-----------|-----------|
| <b>MODEL A</b>            |                       |      |           |           |
| # working hours per week  | -                     | 1.03 | 1.02-1.04 | 0.000*    |
| per 20 hours increase     | -                     | 1.81 | 1.49-2.19 | -         |
| Presence of cats on farm  | No                    | 1    | -         | -         |
|                           | Yes                   | 2.80 | 1.23-6.36 | 0.014*    |
| Presence of sheep in farm | No                    | 1    | -         | -         |
|                           | Yes                   | 1.83 | 0.89-3.77 | 0.100     |
| Changing room available   | No                    | 1    | -         | -         |
|                           | Yes                   | 0.48 | 0.20-1.13 | 0.094     |
| Cleaning of baby boxes    | No                    | 1    | -         | -         |
|                           | Yes                   | 3.96 | 1.59-9.90 | 0.003*    |
| <b>MODEL B</b>            |                       |      |           |           |
| Age                       | -                     | 1.02 | 1.00-1.05 | 0.037*    |
|                           | per 10 years increase | -    | 1.26      | 1.01-1.56 |
| Presence of cats on farm  | No                    | 1    | -         | -         |
|                           | Yes                   | 2.57 | 1.05-6.33 | 0.040*    |
| Presence of sheep in farm | No                    | 1    | -         | -         |
|                           | Yes                   | 1.78 | 0.88-3.59 | 0.107     |

|                |     |      |           |        |
|----------------|-----|------|-----------|--------|
| Sorting calves | No  | 1    | -         | -      |
|                | Yes | 3.10 | 1.14-8.47 | 0.027* |

\* P-value statistically significant (i.e. < 0.05).

### Contamination of the environment with MRSA

At the beginning of the production cycle, MRSA was detected in only 4.6% of all EDCs placed in stables and on 6 farms. Differences in environmental exposure across persistent, intermittent and non-carrier farms were not significant (Table 3). None of the EDCs placed inside the houses were found to be positive for MRSA.

In week 12, MRSA was detected in 50.6% of all EDCs placed in the stables and on 39 farms. There was a significantly higher proportion of EDCs positive for MRSA and a trend for higher CFU counts per EDC in farms where MRSA carriers were found in week 12 (Table 4). Stratified analysis was performed in farmers and family members. The same trends for higher MRSA environmental load were found only in farmers, however not statistically significant (results not shown). MRSA was found in EDCs from 10 houses (Table 4).

The mean pooled MRSA prevalence in calves rose from 18.7% at day 0 to 46% in week 12. A simple linear regression between the EDC MRSA levels (maximum log-transformed MRSA CFU/EDC per farm) and animal prevalence showed a positive and significant association ( $\beta=0.006$ ,  $P=0.0014$ ). Furthermore, there was a 60% increased probability for detecting a MRSA-positive EDC in farms where animal prevalence in week 12 was above the mean ( $PR=1.6$ ,  $95\%CI=1.09-2.38$ ,  $P=0.02$ ). With regards to human carriage in relation to animal prevalence, no association between being a MRSA carrier and the prevalence in calves was found on day 0. [On week 12 there was a slight increase in prevalence among farmers as compared to the previous sampling moment \(see supplemental figure 1\) and However, a significant association was found at the last sampling moment.](#) Individuals from farms with MRSA prevalence in calves above the mean were at 2 times higher risk for carrying MRSA ~~in week 12~~ ( $PR=2.12$ ,  $95\%CI=1.12-4.01$ ,  $P=0.02$ ).

Table 3. Environmental MRSA samples (EDCs) taken in stables at the beginning of the production cycle in 51 farms with persistent, intermittent or non-MRSA carrying veal calf farmers and household members.

|                                                         | Persistent <sup>a</sup> | Intermittent <sup>a</sup> | Non-carrier <sup>a</sup> | P-value <sup>b</sup> |
|---------------------------------------------------------|-------------------------|---------------------------|--------------------------|----------------------|
| No. farms with MRSA positive EDCs / total no. farms (%) | 2/18 (11.11)            | 2/12 (16.67)              | 2/21 (9.52)              | 0.86                 |
| No. MRSA positive EDCs / total no. EDCs (%)             | 2/69 (2.90)             | 4/47 (8.51)               | 3/78 (3.85)              | 0.38                 |
| GM MRSA CFU/EDC (p-value) <sup>c</sup>                  | <1 (0.75)               | <1 (0.29)                 | <1 (ref.)                | -                    |

<sup>a</sup> A farm was categorised as persistent when there was at least one persistent carrier living and/or working on the farm, non-carrier farms had no individual positive for MRSA in nasal swabs on days 0,4,7 and intermittent farms were the remaining.

<sup>b</sup> P-values among proportions were calculated with Fisher's exact test. Mean values had not an overall assigned p-value since they could not be tested with non-parametric tests.

<sup>c</sup> Geometric mean (antilogged results from tobit regression). P-values indicate the difference with the reference category (non-carrier farm).

Table 4. Environmental MRSA samples (EDCs) taken in stables on week 12 in 49 farms with MRSA carriers and non-carriers.

|                                                         | Location EDC       | Carrier farms <sup>a</sup> | Non-carrier farms <sup>a</sup> | P-value <sup>b</sup> |
|---------------------------------------------------------|--------------------|----------------------------|--------------------------------|----------------------|
| No. farms with MRSA positive EDCs / total no. farms (%) | Stable             | 22/25 (88.00)              | 17/24 (70.83)                  | 0.14                 |
|                                                         | House              | 3/25 (12.00)               | 7/24 (29.17)                   | 0.17                 |
| No. MRSA positive EDCs / total no. EDCs (%)             | Stable             | 54/90 (60.00)              | 35/86 (40.70)                  | 0.01                 |
|                                                         | House <sup>d</sup> | -                          | -                              | -                    |
| GM <sup>c</sup> MRSA CFU/EDC                            | Stable             | 27.54                      | 16.98                          | 0.06                 |
|                                                         | House              | 2.29                       | 5.50                           | 0.29                 |

<sup>a</sup> A farm was categorised as carrier when there was at least one carrier on week 12 living and/or working on the farm, non-carrier farms were the remaining.

<sup>b</sup> P-values among proportions were calculated with Chi-square test and Fisher's exact test when 20% of the expected cell values were <5. P-values for the GM indicate the difference with the reference category (non-carrier farms).

<sup>c</sup> Geometric mean (antilogged results from tobit regression). <sup>d</sup> There was one EDC per house, thus the values in this line are the same as the ones in "No. farms with MRSA positive EDCs / total no. farms (%)".

## DISCUSSION

The associations found during the first week after arrival of the animals on the farm show that the level of exposure to veal calves and the presence of potential animal reservoirs (pets, free-ranging farm cats and sheep) are risk factors for persistent MRSA carriage in farmers and household members. Additionally, persistent MRSA carriers seem to have a different microbiological profile when compared to intermittent and non-carriers, which is characterised by higher MRSA CFU counts, presence of MRSA in throat and absence of MSSA. This study shows that as the production cycle advances, there is a rise in MRSA prevalence in calves that leads to higher contamination of the air and higher probability for human MRSA carriage.

Descriptive results confirm that high MRSA carriage prevalence (17.6%) is observed among individuals living on farms, as seen in other studies.<sup>(2,16)</sup> This percentage represents a carriage burden in countries where estimated MRSA prevalence in community is below 1% such as the Netherlands and Scandinavian countries. The large difference in prevalence between farmers and family members can be attributed to the different intensity of animal

1  
2  
3  
4  
5  
6  
7 395 contact and is again an indication of a low LA-MRSA human-to-human transmission.(16,22)  
8 396 [Swabs in liquid transport medium were used only on day 0 for the purpose of quantification.](#)  
9 397 [The fact that higher prevalences are observed on day 0 as compared to days 4 and 7 might be](#)  
10 398 [due to highest sensitivity for MRSA detection as compared to dry cotton swabs](#)  
11 399 [\(supplemental figure 1\).](#) The carriage patterns of *S. aureus* presented are similar to those  
12 400 described by Wertheim and co-authors,(23) in which they found percentages of 20%, 30%  
13 401 and 50% for persistent, intermittent and non-carriers respectively among healthy individuals.  
14 402 The lower MRSA persistent carrier prevalence in the total study population (9.7%) as  
15 403 compared to the average cross-sectional MRSA prevalence (17.6%) indicates that carriage of  
16 404 LA-MRSA is fleeting and varies within individuals.

17  
18 405 [Confirmation of only ST398 was done in the laboratory and it was predominant \(higher](#)  
19 406 [than 90%\) among the MRSA isolates from humans, animal pools and EDC samples. MRSA](#)  
20 407 [positive subjects negative for ST398 did not visit a hospital during the previous 12 months of](#)  
21 408 [the study and there was other than ST398 MRSA present in animal and environmental](#)  
22 409 [samples. All MRSA was considered to be circulating and transmitted in the farm since it is](#)  
23 410 [very likely that other livestock-associated sequence types were present as in previous studies](#)  
24 411 [\(14, 16\).](#)

25 412 Due to culturing techniques, MSSA was detected with difficulty when there was a  
26 413 predominant MRSA growth. The possible underestimation of MSSA asks for a cautious  
27 414 interpretation of the results. Nevertheless it is remarkable that no persistent MRSA carrier  
28 415 was positive for MSSA at day 0. This suggests that the presence of MSSA in the nose might  
29 416 be a protective factor for MRSA persistent carriage. Moreover, a negative association  
30 417 between MSSA and MRSA has been recently found in a study.(14)

31  
32 418 In the first week of the production cycle the MRSA environmental load was lower and it  
33 419 can be assumed that nasal contamination with MRSA-containing dust particles and transient  
34 420 mechanical carriage was less likely to occur as compared to further time points in the  
35 421 production cycle. As shown in figure 2, there is an increased probability for persistent MRSA  
36 422 carriage associated with higher MRSA CFU counts in nasal swabs. Moreover, isolation of  
37 423 MRSA in throat swabs at day 0 was significantly associated to the outcome (PR=12.2). These  
38 424 findings suggest that there might be a true colonization in persistent MRSA carriers as  
39 425 defined here. Furthermore a recent study has shown that ST398 is capable of adequately  
40 426 competing for a niche with a human strain and survives in the human nose for longer  
41 427 periods.(24)

42 428 Direct association between administration of antibiotics and MRSA persistent carriage in  
43 429 farmers and their family members, as defined in our study, was shown in univariate results  
44 430 (PR=3.2). It is known that when antimicrobials are administered to animals, substantial  
45 431 quantities of these drugs can be present in manure, on surfaces of animal houses and in dust  
46 432 as a potential risk source.(25) We could hypothesize that aspiration of dust containing  
47 433 antibiotics, either from a contaminated environment or directly from a powder formulation,  
48 434 would exert a selective pressure in the anterior nares leading to higher risk for MRSA  
49 435 persistent carriage in people occupationally exposed. However, this association was not  
50 436 confirmed in multivariate models and it needs further exploration. Number of working hours  
51 437 and other tasks were correlated and may have more influence on persistent carriage. This was  
52 438 also shown when adjustment for number of working hours was done in a bivariate fashion.

1  
2  
3  
4  
5  
6  
7 439 This study supports that close contact with animals is a major risk factor for persistent  
8 440 LA-MRSA carriage in humans. This is made clear by the final set of variables retained in the  
9 441 multivariate models. The number of working hours was most strongly associated with  
10 442 persistent carriage as indicated by the model A and by the smoothed exposure-response  
11 443 relation shown in the Supplemental Figure 3. Moreover, when the number of working hours  
12 444 was removed for model B, another variable representing close contact with animals (stable  
13 445 management) was retained by the backward procedure.

14  
15 446 In recent years, several reports have suggested a potential role for pet animals,  
16 447 specifically cats and dogs, in household MRSA transmission and relapse of human MRSA  
17 448 infections. This transmission seems to be of anthroozoonotic origin. Thus, pets can acquire  
18 449 human strains from humans and they can cause colonization or infection in human  
19 450 cohabitants.(26-31) In most cases, the distribution of the clones in pet animals has mirrored  
20 451 the epidemiology of human clones and mainly shared hospital-associated (HA) and  
21 452 community-associated (CA) MRSA strains have been reported. It is remarkable that in this  
22 453 study, having a pet in the household was strongly associated with MRSA carriage in veal  
23 454 farmers and household members. Moreover, there is a demonstrated spread of LA-MRSA  
24 455 between animal species, humans and the farm environment.(32) In this study ~~However, no~~  
25 456 ~~other animals apart from veal calves were sampled, however, in this study,~~ the presence of  
26 457 free-ranging farm cats and sheep were significantly associated and retained in multivariate  
27 458 models. A previous large cross-sectional study sampled 35 cats from 25 farms. 26 of them  
28 459 came frequently in the veal stables. Only one of these cats was found to be MRSA positive  
29 460 with a spa type t011 (ST398).(33) Cats might act as reservoirs but this is more suggestive of  
30 461 cats acting as mechanical vectors. These animals might represent an intermittent source of  
31 462 LA-MRSA that might contribute to LA-MRSA persistent carriage in humans. ~~However, no~~  
32 463 ~~other animals apart from veal calves were sampled in this study.~~

33 464 Other farm characteristics and hygiene practices were also associated with persistent  
34 465 MRSA carriage, although not significantly. Having a changing room in the farm and using a  
35 466 clean towel after working in the stables were found as protective factors. This might give a  
36 467 direction to specific preventive strategies. On the other hand, cleaning of baby boxes at the  
37 468 beginning of the production cycle was a risk factor for the outcome (PR=4 in multivariate  
38 469 model A and PR=1.9 in univariate analysis). This hygiene practise could give rise to  
39 470 transitory spread in the air of accumulated MRSA.

40  
41 471 Environmental contamination with dust particles containing MRSA is much lower in veal  
42 472 calf farming as compared to pig farming and associations are less evident.(3334) As shown  
43 473 in table 3, no difference in the environmental MRSA load was found across persistent,  
44 474 intermittent and non-carrier farms at the beginning of the production cycle. However, the  
45 475 two-fold rise in animal prevalence at the end of the study was associated with a considerably  
46 476 higher environmental MRSA load and a significantly higher proportion of MRSA-positive  
47 477 EDCs was found on farms with MRSA carriers on week 12. This finding supports that  
48 478 contamination of the environment plays a role in the acquisition of MRSA in people living or  
49 479 working in the farm.

50 480 A possible limitation of the study is the self-sampling of nose and throat by individuals  
51 481 which might be lacking of accuracy for MRSA detection. This is however believed to be a  
52 482 minor bias. A recent pilot study has shown high degree of agreement between self-samples  
53 483 and investigator samples (93% agreement, kappa 0.85 for nasal swabs and 83% agreement,  
54 484 kappa 0.60 for throat swabs).(3435) Another limitation is the previously described

55  
56  
57  
58  
59  
60

1  
2  
3  
4  
5  
6  
7 485 underestimation of MSSA presence but this is of negligible impact in the results because  
8 486 detection of MRSA and *S. aureus* remains unaffected. Finally, there were many missing  
9 487 values in some variables and they were excluded from the analysis. There were 5 individuals  
10 488 (/211=2%) with missing nasal samples but sensitivity analysis did not reveal significant  
11 489 changes in estimates.

12  
13 490 In conclusion, people living and/or working in veal calf farms who persistently carry  
14 491 MRSA seem to be defined by a differential microbiological profile. The associations found  
15 492 here with the presence of free-ranging farm cats and multispecies farming ask for improved  
16 493 internal and external biosecurity measures. Detailed molecular-epidemiological analysis of  
17 494 MRSA specimens on the farm in various animal species and humans is also essential to  
18 495 identify reservoirs and transmission routes for LA-MRSA. Finally, environmental  
19 496 contamination with MRSA has to be thoroughly studied to assess the extent of its importance  
20 497 in the transmission of MRSA within the veal-calf farming community.

## 21 498 **ACKNOWLEDGEMENTS**

22 500  
23 501 The authors wish to thank all farmers for their participation and all field workers and  
24 502 laboratory assistants, especially Isabella Oosting-Van Schothorst, Arjen Timmerman and  
25 503 Marian Broekhuizen-Stins.  
26 504

## 27 505 **FUNDING**

28 506  
29 507  
30 508 The POM project was funded by The Netherlands Organization for Health Research and  
31 509 Development (ZonMw) (grant number 125020009), the Product Boards for Livestock Meat  
32 510 and Eggs and the Dutch Ministry of Agriculture Nature and Food Quality.  
33 511  
34 512  
35 513

## 36 514 **COMPETING INTERESTS**

37 515  
38 516 None declared  
39 517

## 40 518 **REFERENCES**

- 41  
42 519 (1) Fitzgerald JR. Livestock-associated *Staphylococcus aureus*: origin, evolution and public health  
43 520 threat. *Trends Microbiol* 2012;20:192-8.
- 44 521 (2) Graveland H, Duim B, van Duijkeren E, et al. Livestock-associated methicillin-resistant  
45 522 *Staphylococcus aureus* in animals and humans. *Int J Med Microbiol* 2011;301:630-4.
- 46  
47 523 (3) van Duijkeren E, Box AT, Heck ME, et al. Methicillin-resistant staphylococci isolated from  
48 524 animals. *Vet Microbiol* 2004;103:91-7.
- 49  
50 525 (4) Tiemersma EW, Bronzwaer SL, Lyytikäinen O, et al. Methicillin-resistant *Staphylococcus aureus*  
51 526 in Europe, 1999-2002. *Emerg Infect Dis* 2004;10:1627-34.
- 52  
53 527 (5) van Cleef BA, Monnet DL, Voss A, et al. Livestock-associated methicillin-resistant  
54 528 *Staphylococcus aureus* in humans, Europe. *Emerg Infect Dis* 2011;17:502-5.
- 55  
56  
57  
58  
59  
60



- 1  
2  
3  
4  
5  
6  
7 529 (6) van den Broek IV, van Cleef BA, Haenen A, et al. Methicillin-resistant *Staphylococcus aureus* in  
8 530 people living and working in pig farms. *Epidemiol Infect* 2009;137:700-8.  
9  
10 531 (7) van der Mee-Marquet N, Francois P, Domelier-Valentin AS, et al. Emergence of unusual  
11 532 bloodstream infections associated with pig-borne-like *Staphylococcus aureus* ST398 in France. *Clin*  
12 533 *Infect Dis* 2011;52:152-3.  
13  
14 534 (8) Rasigade JP, Laurent F, Hubert P, et al. Lethal necrotizing pneumonia caused by an ST398  
15 535 *Staphylococcus aureus* strain. *Emerg Infect Dis* 2010;16:1330.  
16  
17 536 (9) Catry B, Van Duijkeren E, Pomba MC, et al. Reflection paper on MRSA in food-producing and  
18 537 companion animals: epidemiology and control options for human and animal health. *Epidemiol Infect*  
19 538 2010;138:626-44.  
20  
21 539 (10) van Cleef BA, Graveland H, Haenen AP, et al. Persistence of livestock-associated methicillin-  
22 540 resistant *Staphylococcus aureus* in field workers after short-term occupational exposure to pigs and  
23 541 veal calves. *J Clin Microbiol* 2011;49:1030-3.  
24  
25 542 (11) Bootsma MC, Wassenberg MW, Trapman P, et al. The nosocomial transmission rate of animal-  
26 543 associated ST398 methicillin-resistant *Staphylococcus aureus*. *J R Soc Interface* 2011;8:578-84.  
27  
28 544 (12) Lekkerkerk WS, van de Sande-Bruinsma N, van der Sande MA, et al. Emergence of MRSA of  
29 545 unknown origin in the Netherlands. *Clin Microbiol Infect* 2012;18:656-61.  
30  
31 546 (13) Porphyre T, Giotis ES, Lloyd DH, et al. A metapopulation model to assess the capacity of spread  
32 547 of methicillin-resistant *Staphylococcus aureus* ST398 in humans. *PLoS One* 2012;7:e47504.  
33  
34 548 (14) Graveland H, Wagenaar JA, Bergs K, et al. Persistence of livestock associated MRSA CC398 in  
35 549 humans is dependent on intensity of animal contact. *PLoS One* 2011;6:e16830.  
36  
37 550 (15) Bos ME, Graveland H, Portengen L, et al. Livestock-associated MRSA prevalence in veal calf  
38 551 production is associated with farm hygiene, use of antimicrobials, and age of the calves. *Prev Vet*  
39 552 *Med* 2012;105:155-9.  
40  
41 553 (16) Graveland H, Wagenaar JA, Heesterbeek H, et al. Methicillin resistant *Staphylococcus aureus*  
42 554 ST398 in veal calf farming: human MRSA carriage related with animal antimicrobial usage and farm  
43 555 hygiene. *PLoS One* 2010;5:e10990.  
44  
45 556 (17) Graveland H, Wagenaar JA, Verstappen KM, et al. Dynamics of MRSA carriage in veal calves:  
46 557 A longitudinal field study. *Prev Vet Med* 2012;107:180-6.  
47  
48 558 (18) Noss I, Wouters IM, Visser M, et al. Evaluation of a low-cost electrostatic dust fall collector for  
49 559 indoor air endotoxin exposure assessment. *Appl Environ Microbiol* 2008;74:5621-7.  
50  
51 560 (19) Kilic A, Muldrew K, Tang Y, et al. Triplex real-time polymerase chain reaction assay for  
52 561 simultaneous detection of *Staphylococcus aureus* and coagulase-negative staphylococci and  
53 562 determination of methicillin resistance directly from positive blood culture bottles. *Diagn Microbiol*  
54 563 *Infect Dis* 2010;66:349-55.  
55  
56 564 (20) Francois P, Pittet D, Bento M, et al. Rapid detection of methicillin-resistant *Staphylococcus*  
57 565 *aureus* directly from sterile or nonsterile clinical samples by a new molecular assay. *J Clin Microbiol*  
58 566 2003;41:254-60.  
59  
60

1  
2  
3  
4  
5  
6  
7  
8  
9  
10  
11  
12  
13  
14  
15  
16  
17  
18  
19  
20  
21  
22  
23  
24  
25  
26  
27  
28  
29  
30  
31  
32  
33  
34  
35  
36  
37  
38  
39  
40  
41  
42  
43  
44  
45  
46  
47  
48  
49  
50  
51  
52  
53  
54  
55  
56  
57  
58  
59  
60

- (21) Graveland H, van Duijkeren E, van Nes A, et al. Evaluation of isolation procedures and chromogenic agar media for the detection of MRSA in nasal swabs from pigs and veal calves. *Vet Microbiol* 2009;139:121-5.
- (22) Wassenberg MW, Hopmans TE, Troelstra A, et al. Methicillin-resistant *Staphylococcus aureus* of livestock origin in Dutch hospitals: high-risk patients need only to be investigated if admitted to hospital. *Ned Tijdschr Geneesk* 2008;152:2681-8.
- (23) Wertheim HF, Melles DC, Vos MC, et al. The role of nasal carriage in *Staphylococcus aureus* infections. *The Lancet Infectious Diseases* 2005;5:751-62.
- (24) Slingerland BC, Tavakol M, McCarthy AJ, et al. Survival of *Staphylococcus aureus* ST398 in the Human Nose after Artificial Inoculation. *PLoS One* 2012;7:e48896.
- (25) Hamscher G, Pawelzick HT, Sczesny S, et al. Antibiotics in dust originating from a pig-fattening farm: a new source of health hazard for farmers? *Environ Health Perspect* 2003;111:1590-4.
- (26) Bender JB, Waters KC, Nerby J, et al. Methicillin-resistant *Staphylococcus aureus* (MRSA) isolated from pets living in households with MRSA-infected children. *Clin Infect Dis* 2012;54:449-50.
- (27) Haenni M, Saras E, Chatre P, et al. A USA300 variant and other human-related methicillin-resistant *Staphylococcus aureus* strains infecting cats and dogs in France. *J Antimicrob Chemother* 2012;67:326-9.
- (28) Bramble M, Morris D, Tolomeo P, et al. Potential role of pet animals in household transmission of methicillin-resistant *Staphylococcus aureus*: a narrative review. *Vector Borne Zoonotic Dis* 2011;11:617-20.
- (29) Coughlan K, Olsen KE, Boxrud D, et al. Methicillin-resistant *Staphylococcus aureus* in Resident Animals of a Long-term Care Facility. *Zoonoses and Public Health* 2010;57:220-6.
- (30) Sing A, Tuschak C, Hörmansdorfer S. Methicillin-Resistant *Staphylococcus aureus* in a Family and Its Pet Cat. *N Engl J Med* 2008;358:1200-1.
- (31) Cefai C, Ashurst S, Owens C. Human carriage of methicillin-resistant *Staphylococcus aureus* linked with pet dog. *Lancet* 1994;344:539-40.
- (32) Pletinckx LJ, Verheghe M, Crombe F, et al. Evidence of possible methicillin-resistant *Staphylococcus aureus* ST398 spread between pigs and other animals and people residing on the same farm. *Prev Vet Med* 2012;109:293-303
- (33) Wagenaar JA, Giessen AW. [Veegerelateerde MRSA: epidemiologie in dierlijke productieketens, transmissie naar de mens en karakterisatie van de kloon. RIVM-rapport 330224001, 2009. \(in Dutch\)](#)
- (334) van Cleef BA, van Benthem B, Verkade E, et al. Dynamics of MRSA carriage in pig farmers: a prospective cohort study. Submitted 2013.
- (3435) van Cleef BA, van Rijen M, Ferket M, et al. Self-sampling is appropriate for detection of *Staphylococcus aureus*: a validation study. *Antimicrob Resist Infect Control* 2012;1:34.

Formatted: Dutch (Netherlands)

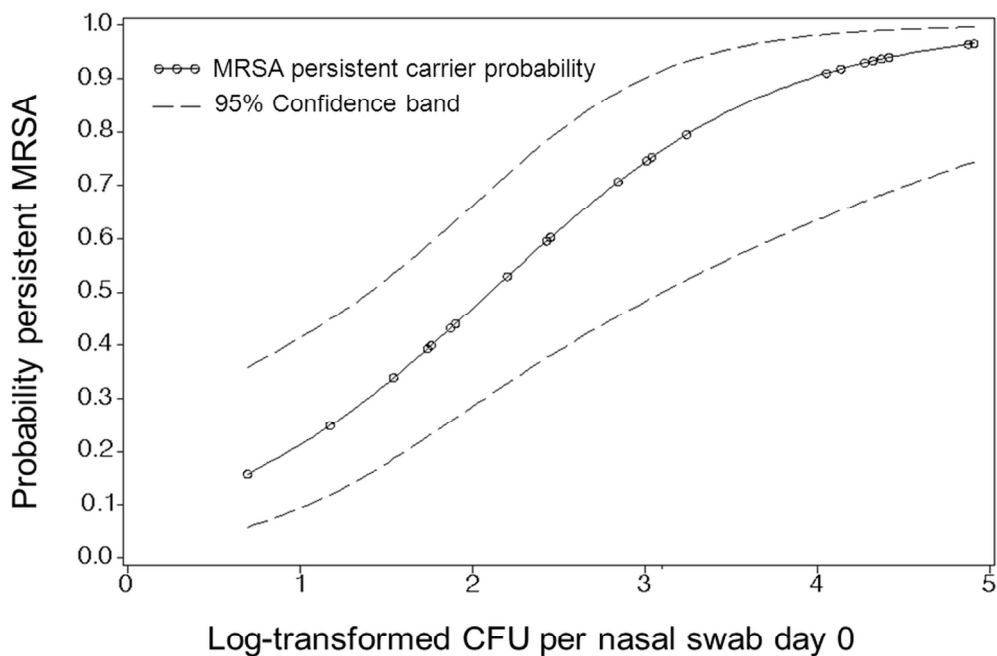

Figure 1. Probability of nasal MRSA persistent carriage and its relationship with the log-transformed CFU from MRSA positive nasal swabs at day 0. Nonparametric regression modelling.  
119x90mm (300 x 300 DPI)

ew only



- ◇ MRSA in farmers and family members
- MRSA in farmers
- △ MRSA in family members

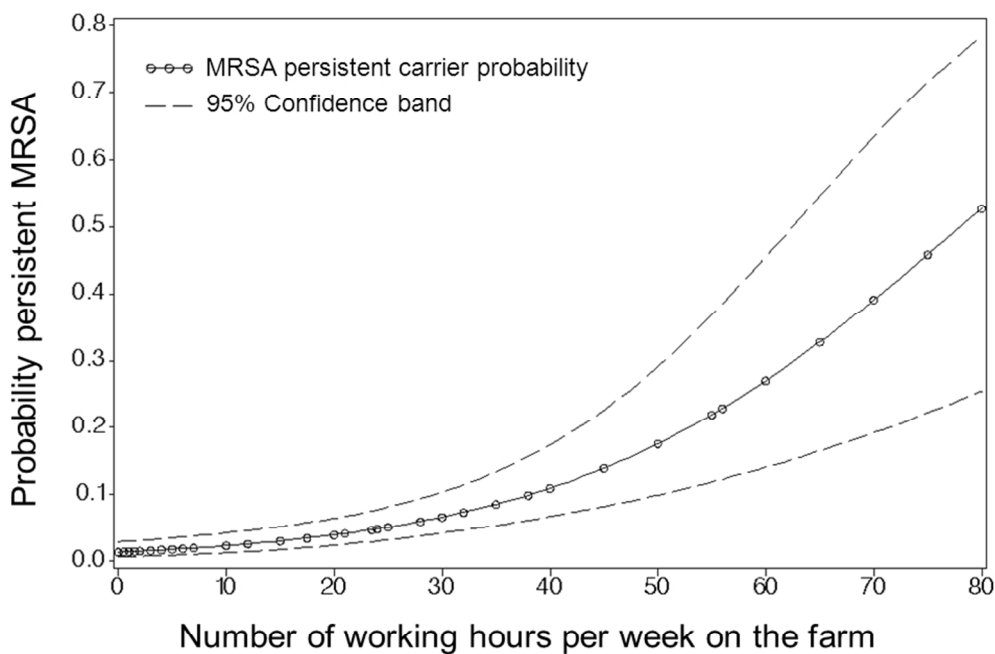

Probability of nasal MRSA persistent carriage and its relationship with number of working hours in the farm. Semiparametric regression modelling setting sex and age as parametric components for adjustment  
254x190mm (96 x 96 DPI)

For peer review only

Supplemental Table 1. Patterns for one week nasal carriage of *S. aureus*, MRSA and MSSA in the total study population and subpopulations of farmers, household members and employees.

|                                  | No. persistent (%) <sup>a</sup> | No. intermittent (%) <sup>a</sup> | No. non-carrier (%) <sup>a</sup> | Total no. |
|----------------------------------|---------------------------------|-----------------------------------|----------------------------------|-----------|
| <b>MRSA in nose:</b>             |                                 |                                   |                                  |           |
| Total population <sup>b</sup>    | 20 (9.7)                        | 35 (17.0)                         | 151 (73.3)                       | 206       |
| Farmers                          | 9 (15.5)                        | 15 (25.9)                         | 38(61.3)                         | 62144     |
| Family members                   | 11 (7.6)                        | 20 (13.9)                         | 113 (78.5)                       |           |
| <b>MSSA in nose:</b>             |                                 |                                   |                                  |           |
| Total population <sup>b</sup>    | 25 (12.1)                       | 36 (17.5)                         | 145 (70.4)                       | 206       |
| Farmers                          | 3 (5.2)                         | 14(22.6)                          | 45(72.5)                         | 62144     |
| Family members                   | 22 (15.3)                       | 22 (15.3)                         | 100 (69.4)                       |           |
| <b><i>S. aureus</i> in nose:</b> |                                 |                                   |                                  |           |
| Total population <sup>b</sup>    | 47 (22.8)                       | 61 (29.6)                         | 98 (47.6)                        | 206       |
| Farmers                          | 14 (24.1)                       | 22(35.5)                          | 26(41.9)                         | 62144     |
| Family members                   | 33 (22.9)                       | 39 (27.1)                         | 72 (50.0)                        |           |

<sup>a</sup> A person was persistent carrier when each of the nasal swabs collected on days 0, 4 and 7 was positive for MRSA or MSSA; For *S.aureus* carriage patterns, people intermittently positive to MRSA or MSSA were also considered as persistent as long as they were carriers of the resistant or susceptible strains on days 0,4 and 7. Non-carriers had no positive swabs; intermittent carriers were the remaining persons.

<sup>b</sup> there were 5 missing values (total study population = 211).

STROBE Statement—checklist of items that should be included in reports of observational studies

|                           | Item No               | Recommendation                                                                                                                                                                                                                                                                                                                                                                                                                                                                                                                                                                                                                                                                                                                                        |
|---------------------------|-----------------------|-------------------------------------------------------------------------------------------------------------------------------------------------------------------------------------------------------------------------------------------------------------------------------------------------------------------------------------------------------------------------------------------------------------------------------------------------------------------------------------------------------------------------------------------------------------------------------------------------------------------------------------------------------------------------------------------------------------------------------------------------------|
| <b>Title and abstract</b> | 1 ✓                   | (a) Indicate the study's design with a commonly used term in the title or the abstract<br>(b) Provide in the abstract an informative and balanced summary of what was done and what was found                                                                                                                                                                                                                                                                                                                                                                                                                                                                                                                                                         |
| <b>Introduction</b>       |                       |                                                                                                                                                                                                                                                                                                                                                                                                                                                                                                                                                                                                                                                                                                                                                       |
| Background/rationale      | 2 ✓                   | Explain the scientific background and rationale for the investigation being reported                                                                                                                                                                                                                                                                                                                                                                                                                                                                                                                                                                                                                                                                  |
| Objectives                | 3 ✓                   | State specific objectives, including any prespecified hypotheses                                                                                                                                                                                                                                                                                                                                                                                                                                                                                                                                                                                                                                                                                      |
| <b>Methods</b>            |                       |                                                                                                                                                                                                                                                                                                                                                                                                                                                                                                                                                                                                                                                                                                                                                       |
| Study design              | 4 ✓                   | Present key elements of study design early in the paper                                                                                                                                                                                                                                                                                                                                                                                                                                                                                                                                                                                                                                                                                               |
| Setting                   | 5 ✓                   | Describe the setting, locations, and relevant dates, including periods of recruitment, exposure, follow-up, and data collection                                                                                                                                                                                                                                                                                                                                                                                                                                                                                                                                                                                                                       |
| Participants              | 6 ✓                   | (a) <i>Cohort study</i> —Give the eligibility criteria, and the sources and methods of selection of participants. Describe methods of follow-up <i>Forms and participants willing to participate</i><br><i>Case-control study</i> —Give the eligibility criteria, and the sources and methods of case ascertainment and control selection. Give the rationale for the choice of cases and controls<br><i>Cross-sectional study</i> —Give the eligibility criteria, and the sources and methods of selection of participants<br>(b) <i>Cohort study</i> —For matched studies, give matching criteria and number of exposed and unexposed<br><i>Case-control study</i> —For matched studies, give matching criteria and the number of controls per case |
| Variables                 | 7 ✓                   | Clearly define all outcomes, exposures, predictors, potential confounders, and effect modifiers. Give diagnostic criteria, if applicable                                                                                                                                                                                                                                                                                                                                                                                                                                                                                                                                                                                                              |
| Data sources/measurement  | 8* ✓                  | For each variable of interest, give sources of data and details of methods of assessment (measurement). Describe comparability of assessment methods if there is more than one group                                                                                                                                                                                                                                                                                                                                                                                                                                                                                                                                                                  |
| Bias                      | 9 ✓                   | Describe any efforts to address potential sources of bias                                                                                                                                                                                                                                                                                                                                                                                                                                                                                                                                                                                                                                                                                             |
| Study size                | 10                    | Explain how the study size was arrived at <i>Not reported in manuscript.</i>                                                                                                                                                                                                                                                                                                                                                                                                                                                                                                                                                                                                                                                                          |
| Quantitative variables    | 11 ✓                  | Explain how quantitative variables were handled in the analyses. If applicable, describe which groupings were chosen and why                                                                                                                                                                                                                                                                                                                                                                                                                                                                                                                                                                                                                          |
| Statistical methods       | 12 ✓<br>✓<br>✓<br>NA. | (a) Describe all statistical methods, including those used to control for confounding<br>(b) Describe any methods used to examine subgroups and interactions<br>(c) Explain how missing data were addressed<br>(d) <i>Cohort study</i> —If applicable, explain how loss to follow-up was addressed<br><i>Case-control study</i> —If applicable, explain how matching of cases and controls was addressed<br><i>Cross-sectional study</i> —If applicable, describe analytical methods taking account of sampling strategy<br>(e) Describe any sensitivity analyses                                                                                                                                                                                     |

Continued on next page

1  
2  
3  
4  
5  
6  
7  
8  
9  
10  
11  
12  
13  
14  
15  
16  
17  
18  
19  
20  
21  
22  
23  
24  
25  
26  
27  
28  
29  
30  
31  
32  
33  
34  
35  
36  
37  
38  
39  
40  
41  
42  
43  
44  
45  
46  
47  
48  
49  
50  
51  
52  
53  
54  
55  
56  
57  
58  
59  
60

| <b>Results</b>           |     |                                                                                                                                                                                                              |
|--------------------------|-----|--------------------------------------------------------------------------------------------------------------------------------------------------------------------------------------------------------------|
| Participants             | 13* | (a) Report numbers of individuals at each stage of study—eg numbers potentially eligible, examined for eligibility, confirmed eligible, included in the study, completing follow-up, and analysed            |
|                          | ✓   |                                                                                                                                                                                                              |
|                          | NA  | (b) Give reasons for non-participation at each stage                                                                                                                                                         |
|                          | NA  | (c) Consider use of a flow diagram                                                                                                                                                                           |
| Descriptive data         | 14* | (a) Give characteristics of study participants (eg demographic, clinical, social) and information on exposures and potential confounders                                                                     |
|                          | ✓   |                                                                                                                                                                                                              |
|                          |     | (b) Indicate number of participants with missing data for each variable of interest                                                                                                                          |
|                          |     | (c) <i>Cohort study</i> —Summarise follow-up time (eg, average and total amount)                                                                                                                             |
| Outcome data             | 15* | <i>Cohort study</i> —Report numbers of outcome events or summary measures over time                                                                                                                          |
|                          |     | <i>Case-control study</i> —Report numbers in each exposure category, or summary measures of exposure                                                                                                         |
|                          |     | <i>Cross-sectional study</i> —Report numbers of outcome events or summary measures                                                                                                                           |
| Main results             | 16  | (a) Give unadjusted estimates and, if applicable, confounder-adjusted estimates and their precision (eg, 95% confidence interval). Make clear which confounders were adjusted for and why they were included |
|                          | ✓   |                                                                                                                                                                                                              |
|                          | ✓   | (b) Report category boundaries when continuous variables were categorized                                                                                                                                    |
|                          | NA  | (c) If relevant, consider translating estimates of relative risk into absolute risk for a meaningful time period                                                                                             |
| Other analyses           | 17  | Report other analyses done—eg analyses of subgroups and interactions, and sensitivity analyses                                                                                                               |
|                          | ✓   |                                                                                                                                                                                                              |
| <b>Discussion</b>        |     |                                                                                                                                                                                                              |
| Key results              | 18  | Summarise key results with reference to study objectives                                                                                                                                                     |
|                          | ✓   |                                                                                                                                                                                                              |
| Limitations              | 19  | Discuss limitations of the study, taking into account sources of potential bias or imprecision. Discuss both direction and magnitude of any potential bias                                                   |
|                          | ✓   |                                                                                                                                                                                                              |
| Interpretation           | 20  | Give a cautious overall interpretation of results considering objectives, limitations, multiplicity of analyses, results from similar studies, and other relevant evidence                                   |
|                          | ✓   |                                                                                                                                                                                                              |
| Generalisability         | 21  | Discuss the generalisability (external validity) of the study results                                                                                                                                        |
|                          | ✓   |                                                                                                                                                                                                              |
| <b>Other information</b> |     |                                                                                                                                                                                                              |
| Funding                  | 22  | Give the source of funding and the role of the funders for the present study and, if applicable, for the original study on which the present article is based                                                |
|                          | ✓   |                                                                                                                                                                                                              |

\*Give information separately for cases and controls in case-control studies and, if applicable, for exposed and unexposed groups in cohort and cross-sectional studies.

**Note:** An Explanation and Elaboration article discusses each checklist item and gives methodological background and published examples of transparent reporting. The STROBE checklist is best used in conjunction with this article (freely available on the Web sites of PLoS Medicine at <http://www.plosmedicine.org/>, Annals of Internal Medicine at <http://www.annals.org/>, and Epidemiology at <http://www.epidem.com/>). Information on the STROBE Initiative is available at [www.strobe-statement.org](http://www.strobe-statement.org).
